# 1 **The personalized temporal dynamics of microbiome** 2 **in the airways of cystic fibrosis patients**

3 **Giovanni Bacci<sup>1</sup>, Giovanni Taccetti<sup>2</sup>, Daniela Dolce<sup>2</sup>, Federica Armanini<sup>3</sup>, Nicola Segata<sup>3</sup>,**  
4 **Francesca Di Cesare<sup>1</sup>, Vincenzina Lucidi<sup>4</sup>, Ersilia Fiscarelli<sup>4</sup>, Patrizia Morelli<sup>5</sup>, Rosaria**  
5 **Casciaro<sup>5</sup>, Anna Negroni<sup>6</sup>, Alessio Mengoni<sup>1</sup>, and Annamaria Bevivino<sup>6\*</sup>**  
6

7 <sup>1</sup>Department of Biology, University of Florence, Sesto Fiorentino, 50019, Florence, Italy,

8 <sup>2</sup>Cystic Fibrosis Center, Anna Meyer Children's University Hospital, Department of Pediatrics  
9 Medicine, Florence,  
10 50139, Italy

11 <sup>3</sup>Centre for Integrative Biology, University of Trento, Trento, 38122, Italy

12 <sup>4</sup>Children's Hospital and Research Institute Bambino Gesù, Rome, 00165, Italy

13 <sup>5</sup>Cystic Fibrosis Center, IRCCS G. Gaslini Institute, Department of Pediatrics, Genoa, 16147, Italy

14 <sup>6</sup>Department for Sustainability, Italian National Agency for New Technologies, Energy and  
15 Sustainable Economic Development, ENEA, 00123 Rome, Italy  
16

17 \* Corresponding author

18 Annamaria Bevivino, Department for Sustainability, ENEA, Rome, Italy. Email:  
19 [annamaria.bevivino@enea.it](mailto:annamaria.bevivino@enea.it)  
20

21 Author contribution:

22 Conceived and designed the experiments: AB VL GT EVF AM. Performed the experiments: GB  
23 FDC. Analyzed the data: GB AM AB. Contributed reagents/materials/analysis tools: DD FA PM RS  
24 AN. Wrote the paper: GB AM AB. Provided comments and recommendations that improved the  
25 manuscript: NS GT VL. Supervised research: AB VL GT EVF AM.  
26  
27

## 28 **Abstract**

29 Although the taxonomical composition of the cystic fibrosis (CF) lung microbiome has been largely  
30 inspected, little is still known about the overall gene content and functional profiles of the resident  
31 microbiome. To understand the dynamics of the lung microbiome in relation with patient's disease  
32 status, a large cohort of CF subjects with moderate-severe lung disease was followed over a 15-  
33 month period. Longitudinal assessment of sputum microbiome by shotgun metagenomics revealed a  
34 patient-specific colonization of the primary and emerging CF pathogens. Even if patient genotype  
35 and exacerbation events impacted the microbiome diversity, CF microbiota rebounds to pre-  
36 treatment state. A core set of antibiotic resistance genes was found although their presence was not  
37 affected by antibiotic intake. The microbial resilience and persistence of antibiotic resistant genes  
38 support the growing consensus that the management of chronic CF infection may be improved by a  
39 more patient-specific personalization of clinical care and treatment.

## 40 **Introduction**

41 Cystic Fibrosis (CF) is the most common lethal autosomal recessive disease in Caucasians, caused  
42 by mutations in the gene coding for cystic fibrosis transmembrane conductance regulator (CFTR)  
43 channel<sup>1</sup>. Disruption of chloride anion transport, one of the key underlying features of CF, leads to  
44 altered physiological conditions at epithelial surfaces. In the airways, CFTR mutations result in a  
45 dehydrated viscous mucus that compromises mucociliary clearance and predisposes CF patients to  
46 repeated cycles of airway infection, mucous impaction, and bronchiectasis resulting in the majority  
47 of morbidity and mortality in the patient population<sup>2</sup>. In particular, bacterial lung infections reduce  
48 life expectancy in most CF patients<sup>3</sup>. The affected individuals consistently maintain high bacterial  
49 loads in their airways also during periods of clinical stability that are punctuated by episodes of

50 pulmonary exacerbation<sup>4</sup>. Such periodic episodes of acute pulmonary exacerbation strongly  
51 contribute to the irreversible decline of lung function. Though much is known about the composition  
52 of the microbial infections in CF (for a recent review see<sup>5</sup>), the factors leading to such exacerbations  
53 are still poorly understood. In the past years, studies employing DNA-based analyses of the airway  
54 microbiota of CF patients have shown somewhat discordant results. Indeed, some authors report a  
55 largely stable airway microbiota through periods of exacerbation and antibiotic treatment<sup>6</sup>, while  
56 other indicate of a high inter-patients variability<sup>5,7-9</sup>, but also suggested the possibility to identify  
57 some microbial taxa as biomarker of exacerbation<sup>10</sup>, as well as a role of rare species in  
58 exacerbation<sup>11</sup>. Most of these works are targeted metagenomic surveys performed on a variable  
59 number of patients and focusing on the 16S rRNA gene sequence. However, this approach offers  
60 limited possibilities to infer strain-level and functional (meaning based on functional genes)  
61 insights<sup>12</sup>. These two last points are particularly relevant when host-microbiome interactions are  
62 studied. Indeed, the overall genetic repertoire of the microbiome (i.e. the entire set of genes in all the  
63 genomes of the community members) is the main responsible of the interaction with the host<sup>13</sup>.  
64 Recently, the functional interactions among members of a bacterial community have stirred the  
65 attention of investigators for relating microbiome functionality to human-microbe interaction<sup>14</sup> and  
66 as a perspective for understanding the airway microbiome dynamics in CF<sup>15</sup>. In several human  
67 diseases where the microbial infection is an important factor, such as CF, single patients harbor  
68 genomically different strains, which ultimately may lead to explain individual differences in clinical  
69 outcomes<sup>16-18</sup>. Until now, few longitudinal studies, with a limited number of patients, on CF airway  
70 microbiota have been performed<sup>19,20</sup>. Moreover, studies on CF microbiome are few and on a limited  
71 number of patients<sup>9,21-23</sup> or specific metabolic functions<sup>24</sup>. Moving away from taxonomic inventories  
72 towards a better understanding of the CF microbiome genes opens a new avenue for the  
73 identification of the microbial gene repertoire associated with CF lung disease. An ecological

74 perspective on multispecies and multi-strain colonization of CF airways will permit to understand  
75 the role of polymicrobial dynamics in lung disease progression<sup>25</sup> and provide the clinicians with new  
76 biomarkers of CF progression and targets for antibiotic therapy.

77 In this work, we tried to fill the gap of knowledge about the temporal dynamics of the airway  
78 microbiome in CF, paying special attention to the episodes of exacerbation, by using a shotgun  
79 metagenomic approach<sup>26</sup>, that is targeting the entire genomic repertoire of the microbial community,  
80 down to the strain level<sup>27,28</sup>. A cohort of 22 patients with moderate-severe lung disease, grouped  
81 according to different genotypes (F508<sub>hom</sub>, homozygote F508; F508<sub>het</sub> heterozygote F508), was  
82 selected and followed over 15 months during which 8 patients underwent exacerbation events. This  
83 offered the opportunity to investigate the taxonomic and functional dynamics of the overall  
84 microbiome. The main outcome from this study is a highlight on a patient-specific temporal  
85 dynamic of the microbiome and a clear resilience, following exacerbation, of the microbiome  
86 fraction which includes the main CF pathogens.

## 87 **Methods**

### 88 **Ethics Statement**

89 The study was approved by the Ethics Committees of Children's Hospital and Research Institute  
90 Bambino Gesù (Rome, Italy), Cystic Fibrosis Center, Anna Meyer Children's University Hospital  
91 (Florence, Italy) and G. Gaslini Institute (University of Genoa, Genoa, Italy) [Prot. N. 681 CM of  
92 November 2, 2012; Prot. N. 85 of February 27, 2014; Prot. N. FCC 2012 Partner 4-IGG of  
93 September 18, 2012]. All participants provided written informed consent before the enrollment in  
94 the study. All sputum specimens were produced voluntarily. All procedures were performed in  
95 agreement with the "Guidelines of the European Convention on Human Rights and Biomedicine for  
96 Research in Children" and the Ethics Committee of the three CF Centers involved. All measures

97 were obtained and processed ensuring patient data protection and confidentiality.

## 98 **Demographic and clinical characteristics of enrolled patients**

99 Twenty-two adolescents and adults with CF were enrolled in the study between October 2014 and  
100 March 2015 (Table 1). The study subjects were selected based on eligibility criteria that included all  
101 of the following: (i) a diagnosis of CF, i.e., a sweat test showing sweat Cl  $> 60$  mmol/l and two  
102 known CFTR mutations causing the disease with pancreatic insufficiency (elastase  $< 5$   $\mu\text{g/g/feces}$ )<sup>29</sup>,  
103 (ii) aged more than six years, i.e., between 14 and 55 years, (iii) chronically infected with  
104 *Pseudomonas aeruginosa* and iv) decline in FEV<sub>1</sub> in the previous three years before enrollment<sup>30</sup>.  
105 Patients were excluded if they were chronically infected with *Burkholderia cepacia* complex. Using  
106 these criteria, 22 patients were included in the study for a total of 79 shotgun metagenomic samples.  
107 The cohort was enrolled in three Italian Hospital, namely: Bambino Gesù Children's Hospital  
108 (Rome, Italy), Giannina Gaslini Children's Hospital (Genoa, Italy) and Meyer Children's Hospital  
109 (Florence, Italy). Subjects were treated according to current standards of care with periodical  
110 microbiological controls<sup>31</sup> with at least four microbiological controls per year<sup>4</sup>. At each visit, clinical  
111 data collection and microbiological status (colonizing pathogens with available cultivation  
112 protocols) were performed according to the European CF Society standards of care<sup>32</sup>. Forced  
113 expiratory volume in 1 second as a percentage of predicted (%FEV1) is a key outcome of  
114 monitoring lung function in CF<sup>33</sup>. FEV1 values were measured according to the American Thoracic  
115 Society and European Respiratory Society standards<sup>31</sup>. CFTR genotyping, sex, age, and antibiotic  
116 treatment for each patient were reported in (Table 1 and S1). During serial sampling, data (antibiotic  
117 usage and spirometry) were collected.

## 118 **Sample collection, processing, DNA extraction and sequencing**

119 Sputum samples were obtained by spontaneous expectoration at stable, exacerbation, and post-  
120 exacerbation state. Samples were processed according to standard methods as previously

121 described<sup>13,34</sup>. Bacterial respiratory pathogens were identified using the conventional techniques  
122 reported in the Guidelines, as previously described<sup>34,35</sup>. The number of samples, microbiological  
123 status at sampling and samplings following exacerbation events are reported in Table 1. Sputum  
124 samples were washed in 5 mls PBS and then centrifuged (3,800 g) for 15 minutes. Resulting pellets  
125 were resuspended in 5-10 mls DNase buffer (10 mM Tris-HCl pH 7.5; 2.5 mM MgCl<sub>2</sub>; 0.5 mM  
126 CaCl<sub>2</sub>, pH 6.5) with 7.5 ul of DNase I (2000 Units/ml) per 1 ml of sample (15U/ml final),  
127 incubated for 2 hours at 37C, and washed twice by pelleting at 3,800 g for 15 minutes and  
128 resuspending in 10 ml SE buffer (75 mM NaCl, 25 mM EDTA, pH 7.5). Pellets were then  
129 resuspended in 0.5 ml lysis buffer (20 mM Tris-HCl pH 8.0; 2 mM EDTA pH 8.0; 1% (v/v) Triton;  
130 20 mg/ml Lysozyme final concentration), incubated for 30 minutes at 37C before extracting DNA  
131 with the MoBio Powersoil DNA extraction kit as per manufacturer's instructions. Libraries were  
132 prepared with Nextera XT kit (Illumina) Sequencing was performed on an Illumina HiSeq2500  
133 apparatus (Illumina). Raw sequence data reported in this study have been deposited in the NCBI  
134 "Sequence Read Archive" (SRA) under the project accession PRJNA516870.

### 135 **Bioinformatic analyses**

136 Sequence quality was ensured by trimming reads using StreamingTrim 1.0<sup>36</sup>, with a quality cutoff of  
137 20. Bowtie2<sup>37</sup> was used to screen out human-derived sequences from metagenomic data with the  
138 latest version of the human genome available in the NCBI database (GRCh38) as reference.  
139 Sequences displaying a concordant alignment (mate pair that aligns with the expected relative mate  
140 orientation and with the expected range of distances between mates) against the human genomes  
141 were then removed from all subsequent analyses. Metabolic and regulatory patterns were estimated  
142 using HUMAnN2<sup>38</sup> and considering only those pathways with a coverage value  $\geq 80\%$ , whereas the  
143 taxonomic microbial community composition was assessed using MetaPhlAn2<sup>39</sup>. Reads were  
144 assembled into contigs using the metaSPAdes microbial assembler<sup>40</sup> with automatic k-mer length

145 selection. To establish an airway microbiome gene catalog<sup>12</sup> we first removed contigs smaller than  
146 500bp and then used prodigal in Anonymous mode<sup>41</sup>, as suggested by the author of the tool, to  
147 predict open reading frames (ORFs). Translated protein sequences obtained from assembled contigs  
148 were classified using eggNOG mapper against the bactNOG database<sup>42</sup>. Each protein was classified  
149 according to its best hit with an e-value lower than 0.001 as suggested in<sup>43</sup>. The CARD database<sup>44</sup>  
150 was used in combination to the Resistance Gene Identifier (RGI, version 4.0.3) to inspect the  
151 distribution of antibiotic resistance gene (AR genes). Genes predicted within each metagenome were  
152 quantified using the number of reads that mapped against metagenomic contigs obtained for each  
153 sample. Reads were mapped back to contigs using Bowtie2<sup>37</sup> and the number of reads mapping each  
154 ORF was obtained with the bedtools command “multicov” (version 2.26.0). To quantify gene  
155 content across different samples, genes were collapsed using the bestOG given by eggNOG mapper  
156 by summing together the number of reads that mapped genes with the same annotation. The same  
157 approach was used to quantify AR genes predicted with RGI but this time the unique identifier  
158 provided by CARD was used to collapse counts.

159 Strain characterization was performed using StrainPhlAn<sup>27</sup>. Sequence variants for each organism  
160 detected were assessed against the MetaPhlAn2<sup>39</sup> marker genes and a tree has been generated  
161 including all samples in which the organism was found at least in one time point. One reference  
162 genome per organism was downloaded from the RefSeq database and added to the tree.

### 163 **Taxonomic classification of metagenomic contigs**

164 Assembled contigs were taxonomically classified using BLAST. First, all genomes available for  
165 each species detected with MetaPhlAn2 were downloaded from NCBI and used to build a database  
166 for each sample. All genomes reporting an identity higher than 90% and a coverage higher than 80%  
167 were collected and used for taxonomic classification. Contigs reporting hits with genomes coming

168 from a single species were assigned to that species whereas contigs reporting hits from multiple  
169 species were flagged as unknown.

## 170 **Statistical analyses**

171 Statistical analyses were performed in R<sup>45</sup> version 3.4.4. The taxonomical and functional  
172 composition on lung microbiome was explored using permutational multivariate analysis of variance  
173 (PERMANOVA with 1000 permutations), ‘adonis2’ function of vegan package version 2.5-2;  
174 whereas differences in bacterial diversity were tested using analysis of covariance (ANCOVA),  
175 ‘aov’ function. The model fitted for both analyses was:

$$176 \quad X \sim \text{Exacerbation} + \text{Genotype} + \text{Subject} + \text{FEV}_1 + \text{days}$$

177 where, Exacerbation is the exacerbation event, Genotype is the CFTR genotype, Subject is the  
178 patient, FEV<sub>1</sub> was the forced expiratory volume in 1 second, and days, was the number of days from  
179 the enrollment in the study. For the ANCOVA analyses Tukey's post hoc tests were performed to  
180 test for mean differences within each factor used to build the full model (excluding FEV<sub>1</sub> value and  
181 days since they were not categorical variable). Ordination analyses were conducted on both taxa and  
182 pathways using the function ‘ordinate’ of the phyloseq package (version 1.23.1) with principle  
183 coordinate decomposition method (PCoA) and the Bray-Curtis dissimilarity index. The same index  
184 was used to inspect the distribution of samples and compare beta diversity level in bot taxonomic  
185 composition and pathways.

186 To test for differentially distributed pathways and taxa across exacerbation events and genotypes we  
187 used a moderated t-test as implemented in the limma package<sup>46</sup>, version 3.34.9. Data obtained with  
188 MetaPhlan2 (taxonomic composition) and HUMAnN2 (pathway composition) were fitted into  
189 limma’s model using subjects as blocking variable. Since both software quantify biological units



190 using relative counts (HUMAN2 uses “copies per million” and MetaPhlan2 uses percentages) we  
191 transformed this data into logarithmic values using the formula:  $\log_2(x + 0.1)$ , where x are the  
192 relative counts. Obtained p-values were corrected using the Benjamini-Hochberg correction method.  
193 A similar approach has been used for antibiotic genes detect along assembled contigs. Here the  
194 number of reads that mapped onto each gene was used to estimate differentially abundant gene.  
195 Since the number of reads for each sample was variable (the ratio of the largest library size to the  
196 smallest was more than 10-fold) we used limma’s voom method<sup>47</sup> to fit our model, as suggested by  
197 the author of limma.

## 198 **Results**

### 199 **Population and sampling**

200 Twenty-two patients with CF were enrolled for a total of 15 females and seven males. The patients  
201 were chosen from a larger cohort of patients with moderate-severe lung disease ( $30 < FEV_1 < 70$ )  
202 and chronically infected by *Pseudomonas aeruginosa*. During the study period, they were treated  
203 with maintenance antibiotics (aerosol) and only a subset (n = 8) received clinical intervention in  
204 form of supplementary antibiotics (oral or/and intravenous) for a pulmonary exacerbation (CFPE)  
205 (Table S1). The bacterial microbiome was investigated on sputum samples obtained every 3-4  
206 months from 22 individuals along a survey of 15 months. Within the 22 subjects monitored, 8  
207 underwent episodes of exacerbations, which provided the opportunity to explore the microbiomes  
208 composition along the events. In total, 79 samples from these 22 subjects were collected and  
209 analyzed by a whole metagenomic sequencing approach.

### 210 **Airway microbiomes are taxonomically distinct and show patient-specific strain colonization**

211 The overall taxonomic representation of the microbiomes from the 79 samples is reported in Fig. 1a  
212 and 1b, whereas a summary of obtained reads per sample was reported in Table S2. Firmicutes,

213 Proteobacteria, Bacteroidetes, and Actinobacteria were the most represented phyla. A massive  
 214 presence of the “classical” CF bacterial signatures (taxa), such as *Staphylococcus aureus*, *Rothia*  
 215 *mucillaginosa*, *Pseudomonas aeruginosa*, and *Prevotella melaninogenica* (all present in the top-10  
 216 species within each phylum, Fig. 1b), was found. These species, indeed, represent the 49% of all  
 217 detected taxa as reported in Table S3.

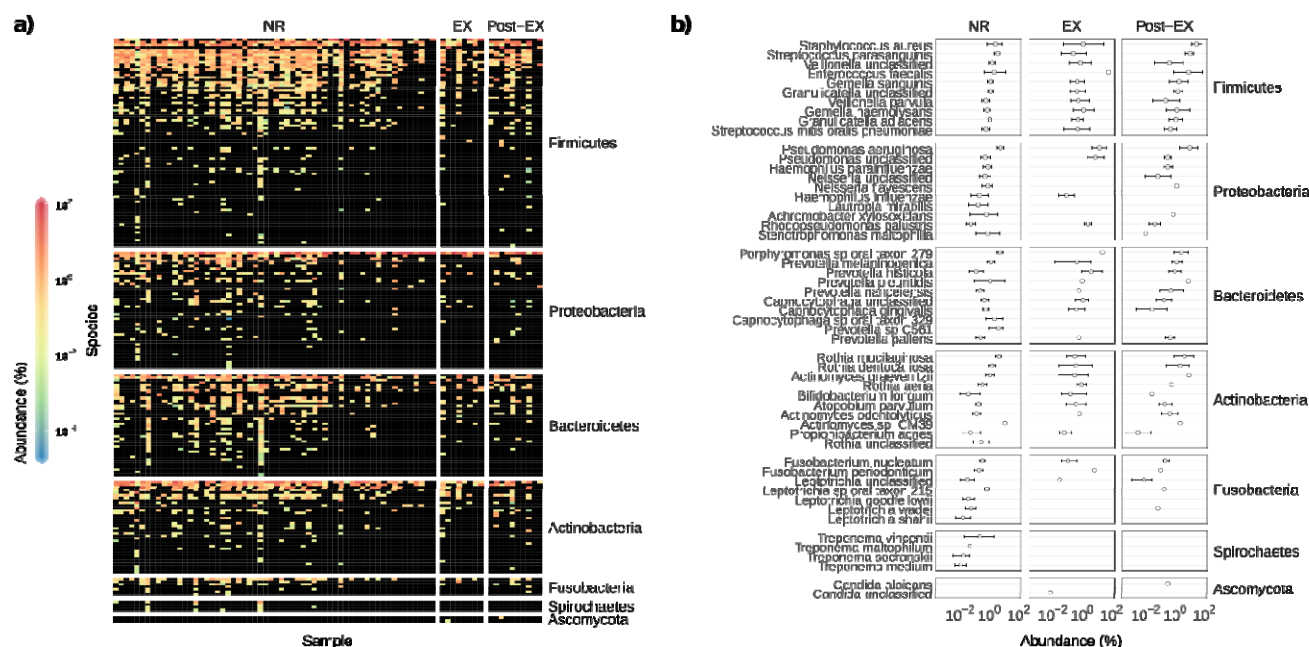

218  
 219 **Figure 1: Taxonomic distribution in patients enrolled in the study.** a) The taxonomic  
 220 distribution of all species detected using MetaPhlan2 was reported in each row of the matrix  
 221 whereas columns represent samples collected during the study. Colors from dark blue to red were  
 222 used to report “copies per million” (CPM) values as obtained from HUMAnN2 with black reporting  
 223 a CPM value of zero. The plot was divided according to exacerbation event (EX), normal status  
 224 (NR) or post-exacerbation samples (Post-EX) defined as the first samples collected after an  
 225 exacerbation event has been occurred. Species were ordered according to their mean abundance and  
 226 grouped according to their Phylum. b) The mean abundance value of the top-ten species (if  
 227 available) detected within each Phylum was reported together with the standard error.

228 Although samples can be hardly clustered based on exacerbation event and/or genotype (Fig. 2a),  
 229 the PERMANOVA analysis reported a significant effect (p-values < 0.05) of both factors. However,

230 the  $R^2$  values, namely the proportion of variance explained by the factor considered, were very low  
231 (0.03 for both factors). The interaction effect between exacerbation event and genotype was not  
232 significant (p-value > 0.05), meaning that different genotypes did not influence the lung microbiome  
233 during exacerbation events and vice versa. The predominant effect observed was the subject effect  
234 (p-value < 0.05), reporting a  $R^2$  value of 0.52, indicating that a high fraction (more than 50%) of the  
235 total variance can be explained by subject (patient) individuality. Both FEV<sub>1</sub> and time did not show  
236 any significant effect (p-values > 0.05, Table 2).

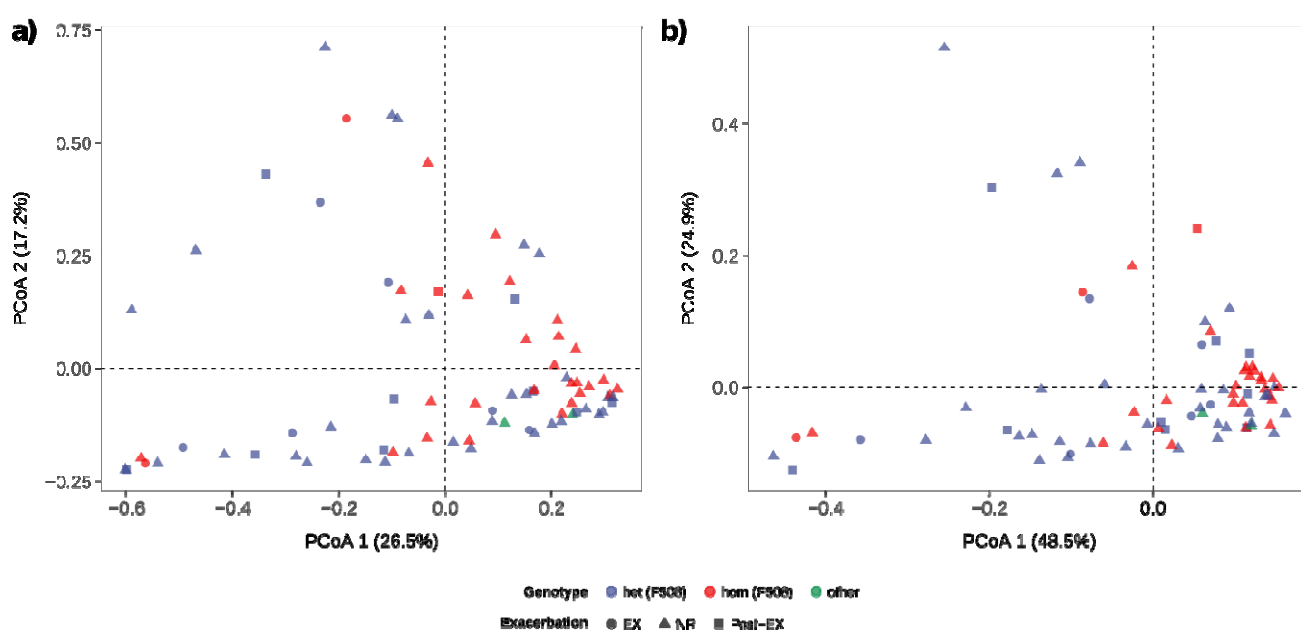

237

238 **Figure 2: Ordination analyses based on a) taxonomic assignments and b) pathway distribution**  
239 **detected with MetaPhlan2 and HUMAnN2, respectively.** Ordination analyses were conducted  
240 using the Bray-Curtis dissimilarity index and ordered following the principle coordinate  
241 decomposition method (PCoA). The percentage of variance explained by each coordinate was  
242 reported between round brackets.

243 The strain-level analysis conducted on both the main CF signatures and on the overall biodiversity  
244 revealed that samples from the same patients tightly clustered together, confirming a high patient-  
245 specific colonization by strains of the above-mentioned species (Fig. 3 and Fig. S1).

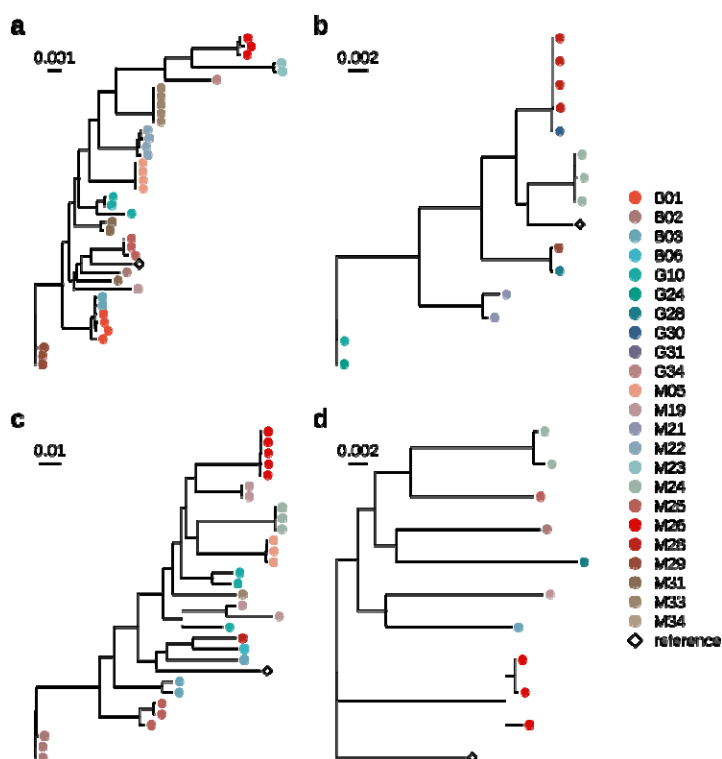

246

247 **Figure 3: Strain-level phylogenetic trees of the main CF pathogens detected in the study.**

248 Phylogenetic trees obtained through StrainPhlAn pipeline were reported for the main pathogenic  
249 signatures of CF disease: a) *Pseudomonas aeruginosa*; b) *Staphylococcus aureus*; c) *Rothia*  
250 *mucilaginosa*; d) *Prevotella melaninogenica*. Patients were reported using different colors as  
251 specified in the figure legend.

252 Alpha diversity analysis confirmed the overall picture of results mentioned above. Different values  
253 of bacterial diversity were found according to exacerbation events, genotypes, and subjects (Fig. 4a,  
254 Fig. S2, and Table S4). Samples collected during exacerbation events reported a lower biodiversity  
255 than samples collected during normal visits, highlighting the role of clinical treatments in perturbing  
256 CF lung communities as confirmed by the Tukey's post hoc test (Table S5).

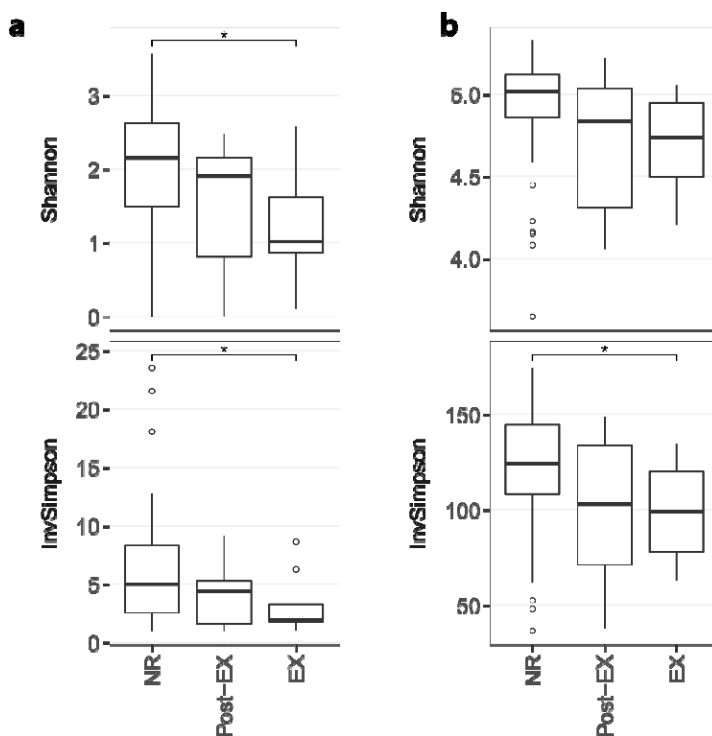

257

258 **Figure 4: Differences across exacerbation events.** The effect of an exacerbation event on alpha  
259 diversity was inspected using both the Shannon index and the inverse Simpson index. Diversity  
260 indexes were computed for both a) taxonomic signature and b) metabolic pathways.

261 **Airway microbiomes are functionally consistent and show subject-specific distribution**  
262 **patterns**

263 Similar results as those reported above were obtained considering the pathway distribution. Indeed,  
264 the PERMANOVA analysis (Table 2) confirmed the effect of exacerbation events and genotypes in  
265 shaping the pathway distribution of CF lung microbiome ( $R^2$  values of 0.04 and 0.03 respectively),  
266 though less marked than the subject-specific effect ( $R^2 = 0.48$ ). The sample distribution according to  
267 the ordination analysis (PCoA) was very heterogeneous with no sharp differences according to  
268 genotypes or exacerbation events. Even here, alpha diversity analyses reported a significant drop of  
269 diversity in samples collected during exacerbation events, but the drop was significant only  
270 considering the inverse Simpson index (Fig. 4b and Table S4). Overall, the pathway distribution was

271 more consistent with respect to the taxonomic one, with biosynthetic pathways being the most  
 272 represented functional category (Fig. 5, Fig. S2, and Table S5). Pathways were mainly detected in  
 273 members of Firmicutes and Proteobacteria phyla, though Bacteroidetes and Actinobacteria were  
 274 quite well represented. Even if these results confirmed the results from the analysis of the taxonomic  
 275 distribution, metabolic pathways showed a more consistent distribution across samples. Indeed, the  
 276 beta-diversity analysis on both taxonomic and functional distribution showed a lower similarity  
 277 based on taxonomy in respect with pathways (Table S6, Fig. 6a and 6b). These results were  
 278 additionally confirmed by the differential abundance analysis. For contrasts made within each  
 279 genotype, only 40 pathways reported significant differences across exacerbation statuses (p-values <  
 280 0.05 and  $|\log(\text{fold-change})| > 5$ ) all in the homozygote group (Fig. S3, Table S7), whereas,  
 281 considering all samples together, no pathway was found to be more abundant in one condition in  
 282 respect with another (data not shown). These results confirmed the extraordinary resilience of the  
 283 CF microbiome even from a functional perspective.

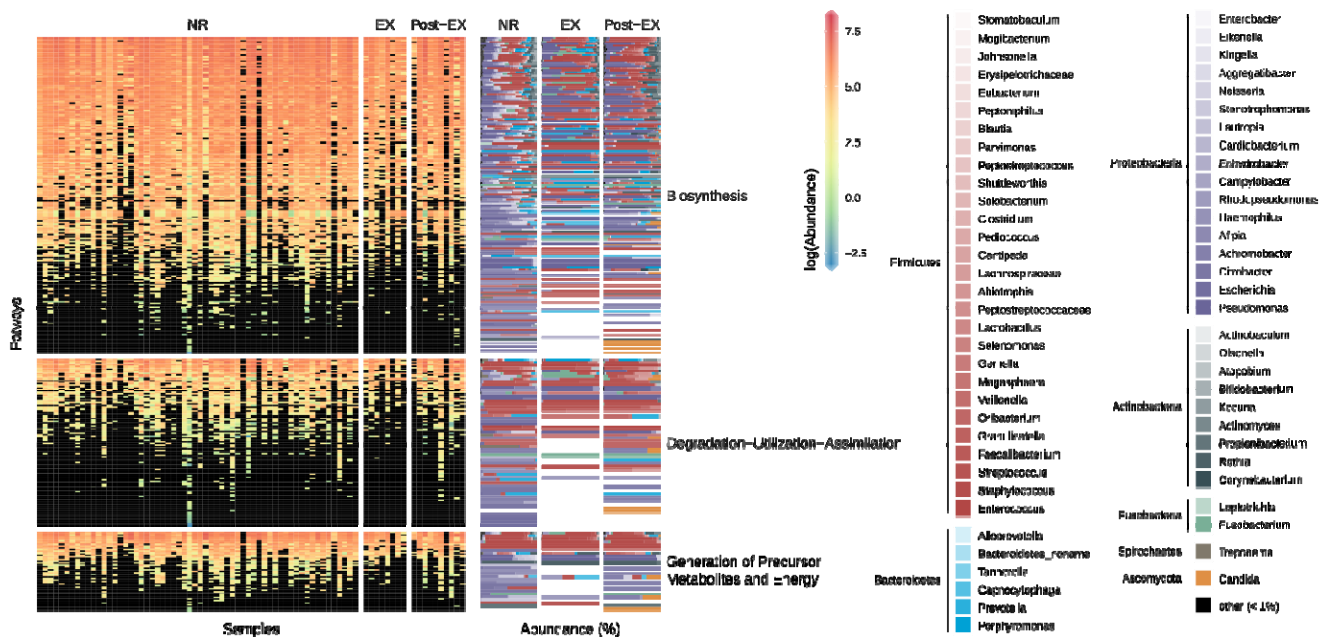

284  
 285 **Figure 5: Pathway distribution according to exacerbation events.** The pathway distribution was  
 286 reported for each sample (columns) and for each pathway detected (rows). Colors from dark blue to

287 red were used to report “copies per million” (CPM) values as obtained from HUMAnN2 with black  
288 reporting a CPM value of zero. On the left, the percentage of taxa in which each pathway was  
289 detected was reported using different colors. The main colors correspond to the Phylum whereas the  
290 different shades correspond to the genus detected (if available).

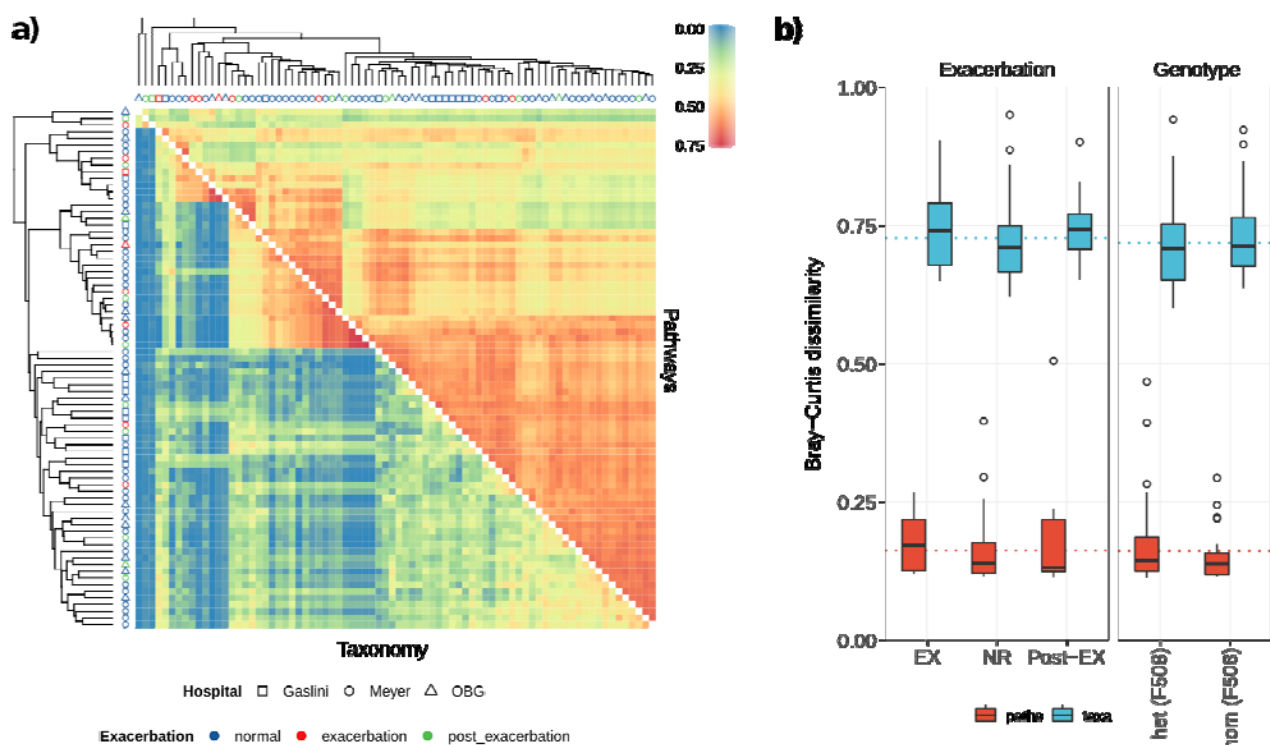

291

292 **Figure 6: Beta diversity analysis on both taxonomic and functional distribution.** a) Hierarchical  
293 clustering based on UPGMA method. Clustering was performed on both pathway distribution (the  
294 upper triangle) and taxonomic composition of samples (lower triangle). The Bray-Curtis distance  
295 was used to compute distances between samples, but it was transformed into similarity value by  
296 subtracting 1 before plotting. Thus, red colors represent high similarity values whereas blue colors  
297 represent low similarity values. The shape of the points on each tip of trees refers to the hospital  
298 whereas the colors refer to the exacerbation events. b) Results of Tukey's post hoc test on beta  
299 diversity values across patient genotypes and exacerbation events. Contrasts were computed even to  
300 test differences between taxonomic distribution and pathways with taxa reporting higher level of  
301 beta diversity.



## 302 **Antibiotic resistance genes through exacerbation events and treatments**

303 Similar to the pathway analysis reported above, antibiotic resistance genes (ARG) were inspected in  
304 relation to exacerbation events. Only six genes were found to be affected by an exacerbation  
305 condition, all regarding samples from F508 heterozygote patients whereas, as found for metabolic  
306 pathways, no gene was significantly impacted by antibiotic treatment when considering all samples  
307 at once (Fig. S4 and Table S8). A similar approach was used to inspect the effect of antibiotic  
308 treatment on ARG distribution. ARG were inspected in relation to the antibiotic treatments reported  
309 in Table S1. The class of each antibiotic was correlated to the presence (and the abundance) of genes  
310 that may, in principle, confer resistance to antibiotics from the corresponding class. Differential  
311 abundance analyses were performed for each classes of antibiotics that was used in this study and  
312 results obtained were reported in Fig. S5 and Table S9. Only 11 genes were found to be affected by  
313 antibiotic intake in different ways. Indeed, 8 out of 11 reported a reduction of abundance during the  
314 treatment whereas the remaining 3 reported an increased abundance in respect with antibiotic intake.  
315 Results obtained confirmed the high resilience of the gene composition of CF lung microbiome. A  
316 highly variable composition along time passing from patients to patients was found (Fig. S2). The  
317 presence of ARGs coupled with antibiotic intake was also explored. Results showed that the  
318 antibiotic resistance classes of each gene corresponded to the antibiotic treatment used in each  
319 sample reporting a big block of ARGs that were present in most of the sample considered (Fig. S6  
320 and Fig. S7).

## 321 **Discussions**

322 Longitudinal studies allow to provide important clues on stability and dynamics of microbial  
323 ecosystems<sup>48</sup>. As all biotic communities, microbial communities tend to evolve towards a stable  
324 composition, either in natural environment and in association with host (as human-associated



325 microbiomes). Changes in the community can be triggered by external conditions, as changes in  
326 host physiology (e.g. inflammation status) and/or other perturbations (e.g. antibiotic treatment).  
327 Indeed, perturbation studies help to probe community dynamics and resilience and possibly discover  
328 new findings for accessing ways for modifying the microbiome<sup>49,50</sup>. Although patients with CF  
329 experiments repeated episodes of pulmonary exacerbations during their lives, a broadly accepted  
330 definition of these events is still missing<sup>4</sup>. Here, we have investigated the temporal dynamics of CF  
331 airway microbiome by using shotgun metagenomics posing attention on exacerbation events which  
332 usually bring to an acute decrease in lung function and an increase in respiratory symptoms (such as:  
333 increased cough, sputum production, and shortness of breath). Key questions were i) what was the  
334 composition and stability of the lung microbiome in patients with CF when longitudinally sampled  
335 at stable and exacerbation events; and ii) if the clinical status influenced the metabolic repertoire and  
336 the AR gene composition of lung bacterial community. Our results describe a unique examination of  
337 the dynamic of the lung microbiome in patients with moderate-severe lung disease carrying the  
338 F508del mutation and containing clinical measurements over a 15-month period.,  
339 The lung microbiome of CF patients seems to be a highly patient-specific environment which can be  
340 directly conditioned by the host and its habits. Indeed, there was less variation within the same  
341 individual at different time points than between different individuals at the same time point, proving  
342 some degree of temporal stability of an individual's lung microbiome. This last point agrees with the  
343 lack of a time effect on the taxonomic distribution of microbiome. The predominant taxa that  
344 colonized the lung of CF patients showed an extraordinary resilience, as witnessed by the presence  
345 of the same strains during the whole period of infection. These results agree with previous  
346 observations based on 16S rRNA gene profiling, though these studies failed to report a strain-  
347 specific overview of the whole dynamic due to the limitations intrinsic to the approach<sup>6,8,11</sup>.  
348 Carmody and colleagues showed a relatively stable lung community that may be altered during

349 period of exacerbation even in the absence of viral infection or antibiotic only in a small group of  
350 patients<sup>10</sup>. Even in other pulmonary diseases, such as non-cystic fibrosis bronchiectasis, lung  
351 bacterial communities showed a conserved structure for long period of time, as showed in the work  
352 by Cox and colleagues where patients were followed for a six-month period<sup>8</sup>. A similar result was  
353 shown in the work from Fodor and colleagues<sup>6</sup> where, though occasional short-term compositional  
354 changes in the airway microbiota were found, the main taxonomic signatures of CF disease were  
355 highly stable.

356 The antibiotic treatment used did not seem to alter this micro-environment for long period of time  
357 since most of the main taxa linked to CF infection are still present even after exacerbation events  
358 that are usually handled by a massive amount of antibiotic. From a taxonomic perspective, samples  
359 coming from the same patient clustered together highlighting the role of the host in bacterial strain  
360 selection during the baseline but even during (and after) exacerbation events. Despite this patient-  
361 specific colonization, the taxonomic composition was very different from one subject to another  
362 event if sampled at the same time point.

363 On the other hand, pathways reported a more homogeneous distribution across patients. This high  
364 conservation could be related to the characteristic of the lung environment itself, such as mucus  
365 compositions, nutrient availability, and oxygen levels, which can be broadly similar across patients  
366 with a similar clinical status. This, is in line with the finding that the function of a biotic community  
367 is more conserved than the presence of single members<sup>51</sup>. In fact, though the lung microbiome in our  
368 study was populated with a relatively large set of microorganisms, the main functions detected are  
369 similar across all patients. From this point of view the airway microbiome can be considered as  
370 performing a similar “ecosystem service”, irrespective of the taxonomy present as pointed out by  
371 various authors in other environments<sup>51-53</sup>. The finding that CFTR genotypes a different  
372 representation in some pathways, may suggest that the airways microbiome is influenced by the type

373 of CFTR alteration. However, this hypothesis deserves further attention to clarify the specific role of  
374 microbial pathways with respect to CFTR genotype. Pathogenic bacteria, such as *Pseudomonas*  
375 *aeruginosa*, need to colonize human tissues to grow and in this sense, even pathway that could be  
376 related to a worsening of clinical conditions or that could be targeted by antibiotic molecules will be  
377 part of this core set of functions. Despite a clear effect of antibiotic treatment during (and after)  
378 exacerbation periods, the community structure is always recovered with the main pathogenic taxa  
379 emerging again. This effect is confirmed by the correlation of ARG distribution and antibiotic  
380 intake. Patients subjected to a given antibiotic treatment did not seem to select bacteria resistant to  
381 the antibiotic used but the detection of a particular mechanism seems to be distributed in almost all  
382 patients regardless of the treatment. An evidence of functional stability of the lung microbiota was  
383 previously reported in other works not concerning CF disease<sup>54,55</sup>. Both works focused their  
384 attention on the gut microbiome of obese and healthy individuals (human and mouse) reporting a  
385 considerable metabolic redundancy. This high degree of redundancy in the gut microbiome supports  
386 a more ecological view where subjects can be considered as different ecological niches all inhabited  
387 by unique collections of microbial phylotypes but all sharing the same set of genes. This concept can  
388 be extended to the lung microbiome where it is possible to define a core set of features only at the  
389 level of metabolic functions. This functional conservation may thus be needed by the whole  
390 community and patients can be seen as multiple micro-environments inhabited by a peculiar set of  
391 strains, which share the same functions. This work represents a step forward toward a patient-  
392 specific interpretation of CF microbiology.

## 393 **Acknowledgments**

394 This study was supported by Italian Grants funded by the Italian Cystic Fibrosis Research  
395 Foundation (FFC) (<http://www.fibrosicistica.ricerca.it/>) to Annamaria Bevivino: Project n.

396 FFC#14/2015 with the contribution of “Delegazione FFC di Latina”, “Latteria Montello Nonno  
397 Nanni”, and “Gruppo di Sostegno FFC Valle Scrivia Alessandria”), and Project n. FFC#19/2017  
398 with the contribution of “Delegazione FFC Lago di Garda con i Gruppi di Sostegno FFC di  
399 Chivasso, dell'Isola Bergamasca, di Arezzo”. Giovanni Bacci was supported by a postdoctoral  
400 fellowship by Italian Cystic Fibrosis Research Foundation. The funders had no role in study design,  
401 data collection and analysis, decision to publish, or preparation of the manuscript. The authors  
402 greatly acknowledge the Italian Cystic Fibrosis Research Foundation (FCC) for its support and  
403 administrative tasks, and Ricciotti Gabriella, Tuccio Vanessa and Campana Silvia for their technical  
404 support.

#### 405 **Conflict of Interest**

406 We have no conflict of interest to declare.

#### 407 **References**

- 408 1. Ratjen, F. & Döring, G. Cystic fibrosis. *Lancet* **361**, 681–689 (2003).
- 409 2. Gibson, R. L., Burns, J. L. & Ramsey, B. W. Pathophysiology and Management of  
410 Pulmonary Infections in Cystic Fibrosis. *Am. J. Respir. Crit. Care Med.* **168**, 918–951 (2003).
- 411 3. Knapp, E. A. *et al.* The Cystic Fibrosis Foundation Patient Registry. Design and methods of a  
412 national observational disease registry. *Ann. Am. Thorac. Soc.* **13**, 1173–1179 (2016).
- 413 4. Flume, P. A. *et al.* Cystic fibrosis pulmonary guidelines: Treatment of pulmonary  
414 exacerbations. *Am. J. Respir. Crit. Care Med.* **180**, 802–808 (2009).
- 415 5. Huang, Y. J. & LiPuma, J. J. The Microbiome in Cystic Fibrosis. *Clin. Chest Med.* **37**, 59–67  
416 (2016).
- 417 6. Fodor, A. A. *et al.* The Adult Cystic Fibrosis Airway Microbiota Is Stable over Time and  
418 Infection Type, and Highly Resilient to Antibiotic Treatment of Exacerbations. *PLoS One* **7**,  
419 e45001 (2012).
- 420 7. Price, K. E. *et al.* Unique microbial communities persist in individual cystic fibrosis patients  
421 throughout a clinical exacerbation. *Microbiome* **1**, 27 (2013).
- 422 8. Cox, M. J. *et al.* Longitudinal assessment of sputum microbiome by sequencing of the 16S  
423 rRNA gene in non-cystic fibrosis bronchiectasis patients. *PLoS One* **12**, 1–17 (2017).
- 424 9. Whelan, F. J. *et al.* Longitudinal sampling of the lung microbiota in individuals with cystic  
425 fibrosis. *PLoS One* **12**, e0172811 (2017).
- 426 10. Carmody, L. A. *et al.* Changes in Cystic Fibrosis Airway Microbiota at Pulmonary  
427 Exacerbation. *Ann. Am. Thorac. Soc.* **10**, 179–187 (2013).
- 428 11. Carmody, L. A. *et al.* The daily dynamics of cystic fibrosis airway microbiota during clinical  
429 stability and at exacerbation. *Microbiome* **3**, 12 (2015).
- 430 12. Qin, J. *et al.* A human gut microbial gene catalogue established by metagenomic sequencing.

- 431 *Nature* **464**, 59–65 (2010).
- 432 13. Bacci, G. *et al.* A different microbiome gene repertoire in the airways of cystic fibrosis  
433 patients with severe lung disease. *Int. J. Mol. Sci.* **18**, 1654 (2017).
- 434 14. Franzosa, E. A. *et al.* Relating the metatranscriptome and metagenome of the human gut.  
435 *Proc. Natl. Acad. Sci.* **111**, E2329–E2338 (2014).
- 436 15. Lim, Y. W. *et al.* Metagenomics and metatranscriptomics: Windows on CF-associated viral  
437 and microbial communities. *J. Cyst. Fibros.* **12**, 154–164 (2013).
- 438 16. Segata, N. On the Road to Strain-Resolved Comparative Metagenomics. *mSystems* **3**, e00190-  
439 17 (2018).
- 440 17. Beghini, F. *et al.* Large-scale comparative metagenomics of *Blastocystis*, a common member  
441 of the human gut microbiome. *ISME J.* **11**, 2848–2863 (2017).
- 442 18. Zolfo, M., Tett, A., Jousson, O., Donati, C. & Segata, N. MetaMLST: Multi-locus strain-level  
443 bacterial typing from metagenomic samples. *Nucleic Acids Res.* **45**, e7 (2017).
- 444 19. Zhao, J. *et al.* Decade-long bacterial community dynamics in cystic fibrosis airways. *Proc.*  
445 *Natl. Acad. Sci.* **109**, 5809–5814 (2012).
- 446 20. Delhaes, L. *et al.* The airway microbiota in cystic fibrosis: A complex fungal and bacterial  
447 community-implications for therapeutic management. *PLoS One* **7**, e36313 (2012).
- 448 21. Willner, D. *et al.* Comparison of DNA extraction methods for microbial community profiling  
449 with an application to pediatric bronchoalveolar lavage samples. *PLoS One* **7**, e34605 (2012).
- 450 22. Lim, Y. W. *et al.* Clinical insights from metagenomic analysis of sputum samples from  
451 patients with cystic fibrosis. *J. Clin. Microbiol.* **52**, 425–437 (2014).
- 452 23. Willner, D. *et al.* Case studies of the spatial heterogeneity of DNA viruses in the cystic  
453 fibrosis lung. *Am. J. Respir. Cell Mol. Biol.* **46**, 127–31 (2012).
- 454 24. Whiteson, K. L. *et al.* Breath gas metabolites and bacterial metagenomes from cystic fibrosis  
455 airways indicate active pH neutral 2,3-butanedione fermentation. *ISME J.* **8**, 1247–58 (2014).
- 456 25. Surette, M. G. The cystic fibrosis lung microbiome. *Ann. Am. Thorac. Soc.* **11**, 61–65 (2014).
- 457 26. Quince, C., Walker, A. W., Simpson, J. T., Loman, N. J. & Segata, N. Shotgun  
458 metagenomics, from sampling to analysis. *Nat. Biotechnol.* **35**, 833–844 (2017).
- 459 27. Truong, D. T., Tett, A., Pasolli, E., Huttenhower, C. & Segata, N. Microbial strain-level  
460 population structure and genetic diversity from metagenomes. 626–638 (2017).  
461 doi:10.1101/gr.216242.116.Freely
- 462 28. Scholz, M. *et al.* Strain-level microbial epidemiology and population genomics from shotgun  
463 metagenomics. *Nat. Methods* **13**, 435–438 (2016).
- 464 29. Farrell, P. M. *et al.* Diagnosis of Cystic Fibrosis: Consensus Guidelines from the Cystic  
465 Fibrosis Foundation. *J. Pediatr.* **181**, S4–S15 (2017).
- 466 30. Bacci, G. *et al.* Pyrosequencing Unveils Cystic Fibrosis Lung Microbiome Differences  
467 Associated with a Severe Lung Function Decline. *PLoS One* **11**, e0156807 (2016).
- 468 31. Kerem, E. *et al.* Standards of care for patients with cystic fibrosis: a European consensus. *J.*  
469 *Cyst. Fibros.* **4**, 7–26 (2005).
- 470 32. Smyth, A. R. *et al.* European cystic fibrosis society standards of care: Best practice  
471 guidelines. *J. Cyst. Fibros.* **13**, S30–S53 (2014).
- 472 33. Taylor-Robinson, D. *et al.* Understanding the natural progression in %FEV1 decline in  
473 patients with cystic fibrosis: a longitudinal study. *Thorax* **67**, 860–866 (2012).
- 474 34. Paganin, P. *et al.* Changes in Cystic Fibrosis Airway Microbial Community Associated with a  
475 Severe Decline in Lung Function. *PLoS One* **10**, e0124348 (2015).
- 476 35. Farrell, P. M. *et al.* Guidelines for diagnosis of cystic fibrosis in newborns through older  
477 adults: Cystic Fibrosis Foundation consensus report. *J Pediatr* **153**, S4–S14 (2008).

- 478 36. Bacci, G., Bazzicalupo, M., Benedetti, A. & Mengoni, A. StreamingTrim 1.0: A Java  
479 software for dynamic trimming of 16S rRNA sequence data from metagenetic studies. *Mol.*  
480 *Ecol. Resour.* **14**, 426–434 (2014).
- 481 37. Langmead, B. & Salzberg, S. L. Fast gapped-read alignment with Bowtie 2. *Nat. Methods* **9**,  
482 357–9 (2012).
- 483 38. Abubucker, S. *et al.* Metabolic reconstruction for metagenomic data and its application to the  
484 human microbiome. *PLoS Comput. Biol.* **8**, e1002358 (2012).
- 485 39. Truong, D. T. *et al.* MetaPhlan2 for enhanced metagenomic taxonomic profiling. *Nat.*  
486 *Methods* **12**, 902–903 (2015).
- 487 40. Nurk, S., Meleshko, D., Korobeynikov, A. & Pevzner, P. A. MetaSPAdes: A new versatile  
488 metagenomic assembler. *Genome Res.* **27**, 824–834 (2017).
- 489 41. Hyatt, D. *et al.* Prodigal: Prokaryotic gene recognition and translation initiation site  
490 identification. *BMC Bioinformatics* **11**, 119 (2010).
- 491 42. Huerta-Cepas, J. *et al.* EGGNOG 4.5: A hierarchical orthology framework with improved  
492 functional annotations for eukaryotic, prokaryotic and viral sequences. *Nucleic Acids Res.* **44**,  
493 D286–D293 (2016).
- 494 43. Pearson, W. R. in *Current protocols in bioinformatics* **42**, 3.1.1-3.1.8 (2013).
- 495 44. Jia, B. *et al.* CARD 2017: Expansion and model-centric curation of the comprehensive  
496 antibiotic resistance database. *Nucleic Acids Res.* **45**, D566–D573 (2017).
- 497 45. R Development Core Team. R: A language and environment for statistical computing. R  
498 Foundation for Statistical Computing, Vienna, Austria. ISBN 3-900051-07-0, URL  
499 <http://www.R-project.org/>. *R Found. Stat. Comput. Vienna, Austria.* (2012).
- 500 46. Ritchie, M. E. *et al.* limma powers differential expression analyses for RNA-sequencing and  
501 microarray studies. *Nucleic Acids Res.* **43**, e47 (2015).
- 502 47. Gentleman, R. C. *et al.* voom: precision weights unlock linear model analysis tools for RNA-  
503 seq read counts. *Genome Biol.* **5**, R80 (2004).
- 504 48. Faust, K., Lahti, L., Gonze, D., de Vos, W. M. & Raes, J. Metagenomics meets time series  
505 analysis: unraveling microbial community dynamics. *Curr. Opin. Microbiol.* **25**, 56–66  
506 (2015).
- 507 49. Shade, A. *et al.* Fundamentals of microbial community resistance and resilience. *Front.*  
508 *Microbiol.* **3**, 417 (2012).
- 509 50. Lozupone, C. A., Stombaugh, J. I., Gordon, J. I., Jansson, J. K. & Knight, R. Diversity,  
510 stability and resilience of the human gut microbiota. *Nature* **489**, 220–30 (2012).
- 511 51. Doolittle, W. F. & Booth, A. It's the song, not the singer: an exploration of holobiosis and  
512 evolutionary theory. *Biol. Philos.* **32**, 5–24 (2016).
- 513 52. Eng, A. & Borenstein, E. Taxa-function robustness in microbial communities. *Microbiome* **6**,  
514 45 (2018).
- 515 53. Louca, S. *et al.* High taxonomic variability despite stable functional structure across microbial  
516 communities. *Nat. Ecol. Evol.* **1**, 0015 (2016).
- 517 54. Turnbaugh, P. J. *et al.* An obesity-associated gut microbiome with increased capacity for  
518 energy harvest. *Nature* **444**, 1027–1031 (2006).
- 519 55. Thaiss, C. A. *et al.* Persistent microbiome alterations modulate the rate of post-dieting weight  
520 regain. *Nature* **540**, 1–27 (2016).
- 521  
522



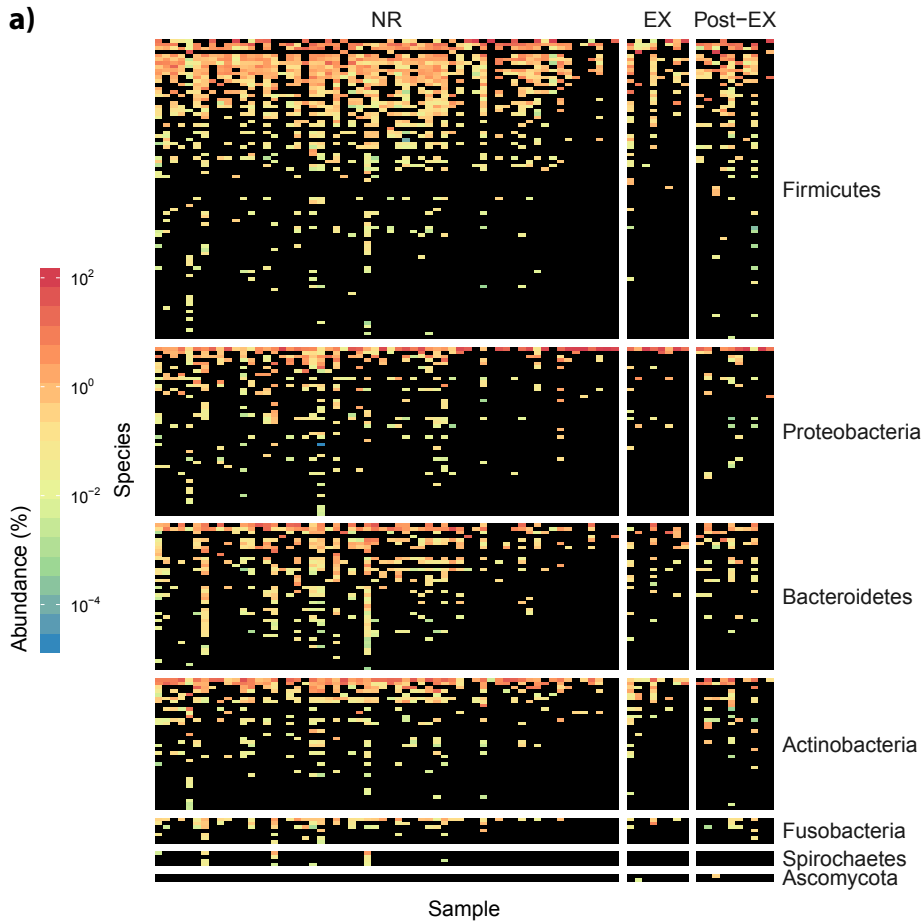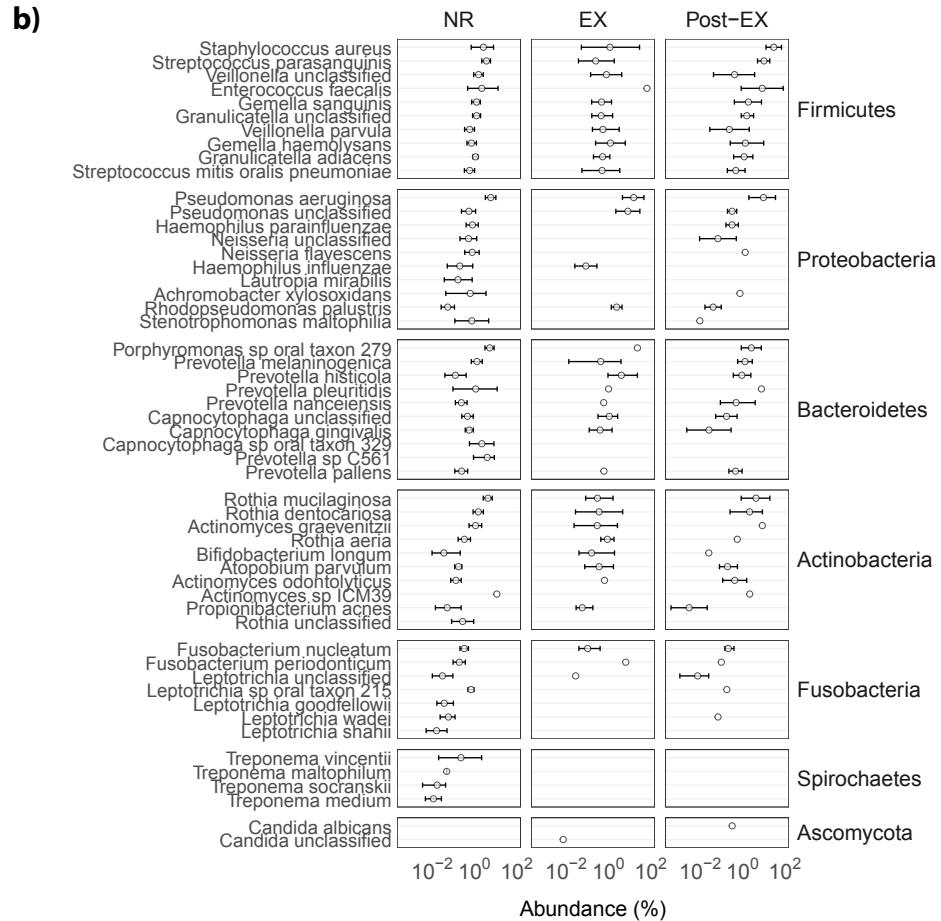

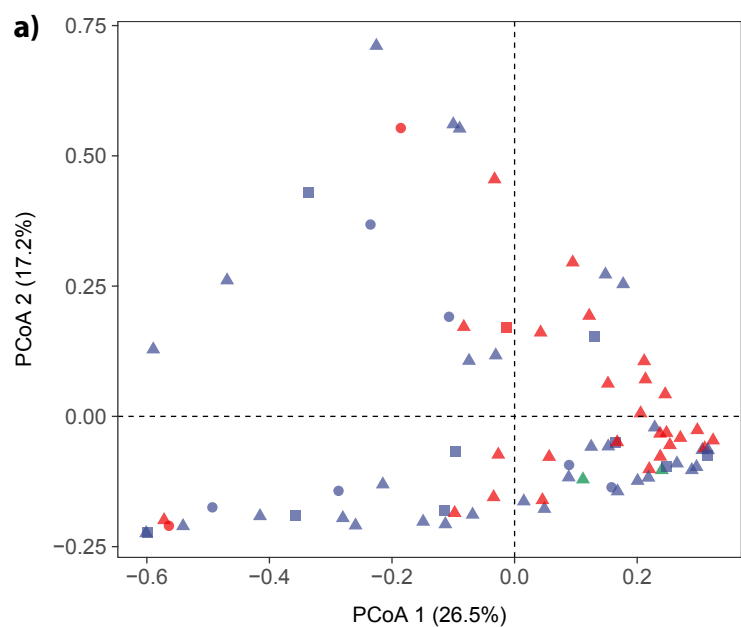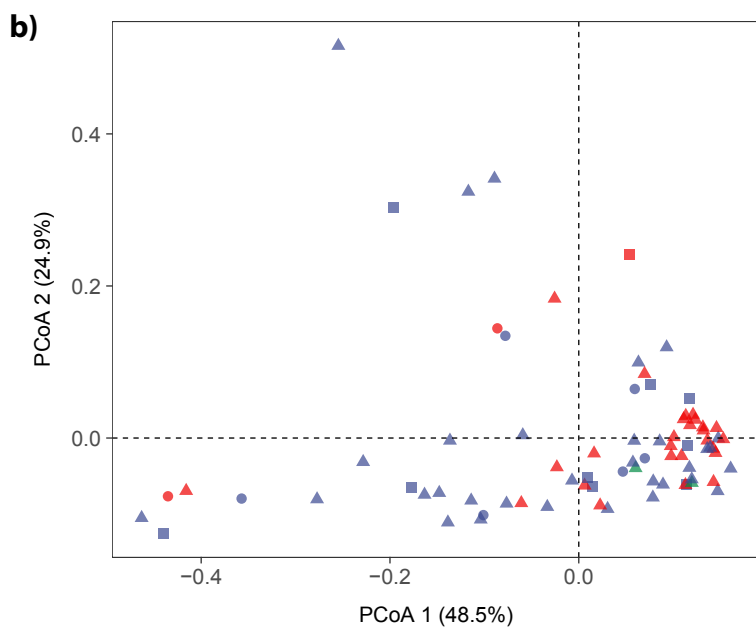

**Genotype** ● het (F508) ● hom (F508) ● other  
**Exacerbation** ● EX ▲ NR ■ Post-EX



**a**

0.001

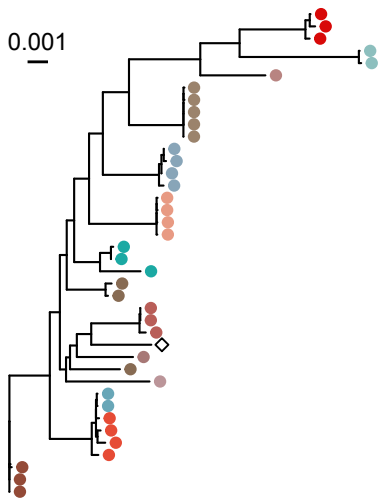**b**

0.002

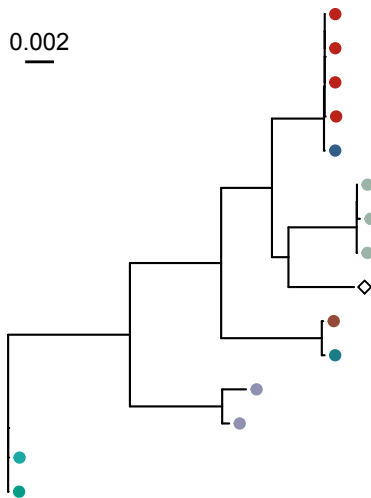**c**

0.01

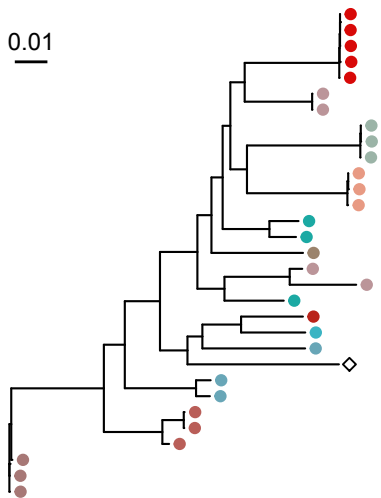**d**

0.002

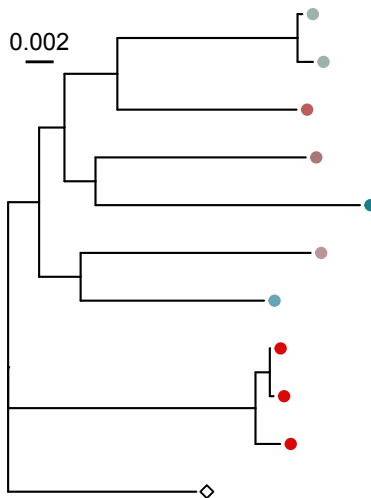

- B01
- B02
- B03
- B06
- G10
- G24
- G28
- G30
- G31
- G34
- M05
- M19
- M21
- M22
- M23
- M24
- M25
- M26
- M28
- M29
- M31
- M33
- M34
- ◇ reference

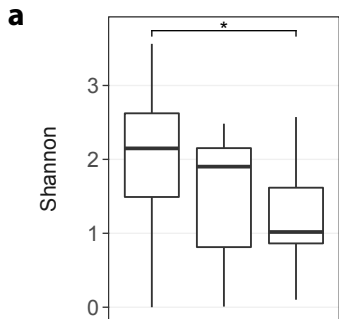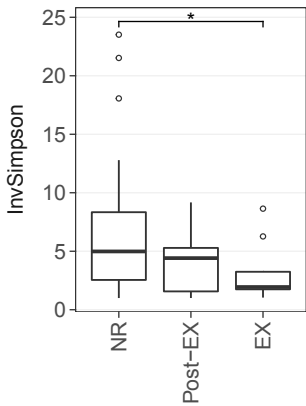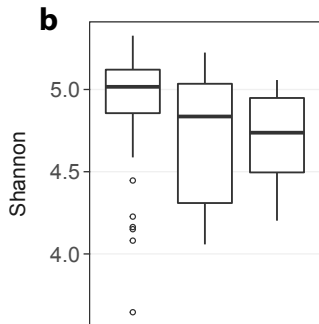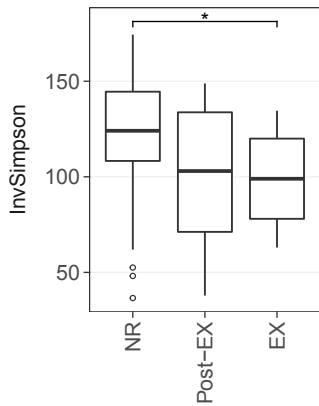

Pathways

NR

EX

Post-EX

NR

EX

Post-EX

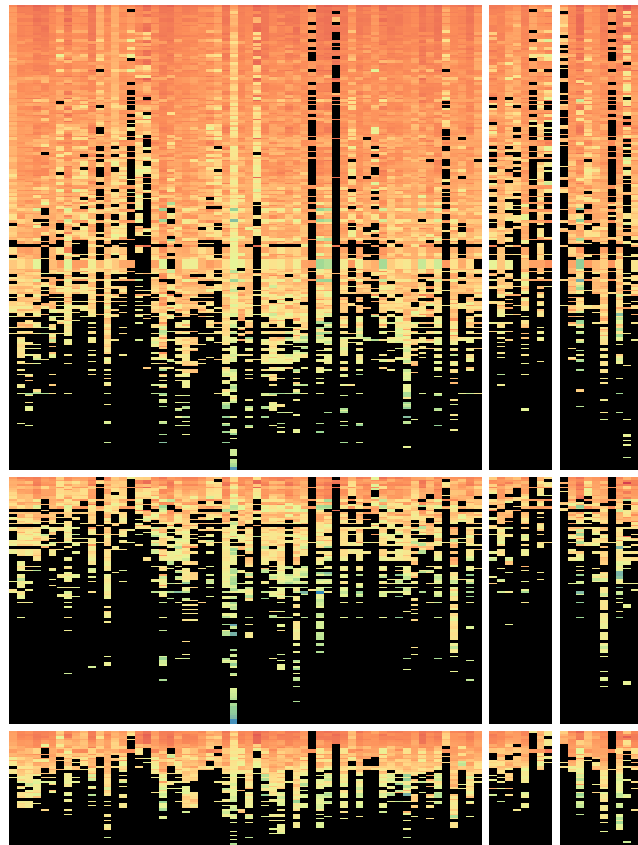

Samples

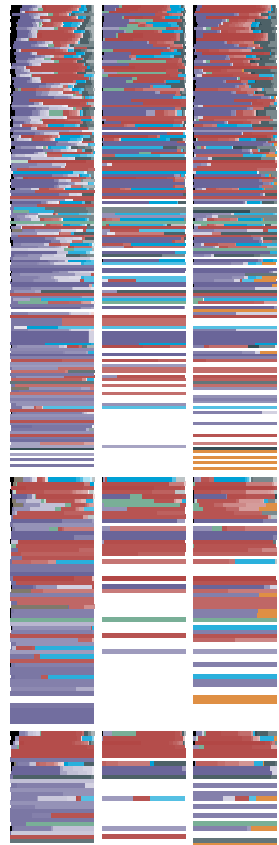

Abundance (%)

log(Abundance)

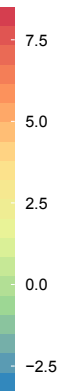

Firmicutes

Bacteroidetes

Biosynthesis

Degradation-Utilization-Assimilation

Generation of Precursor Metabolites and Energy

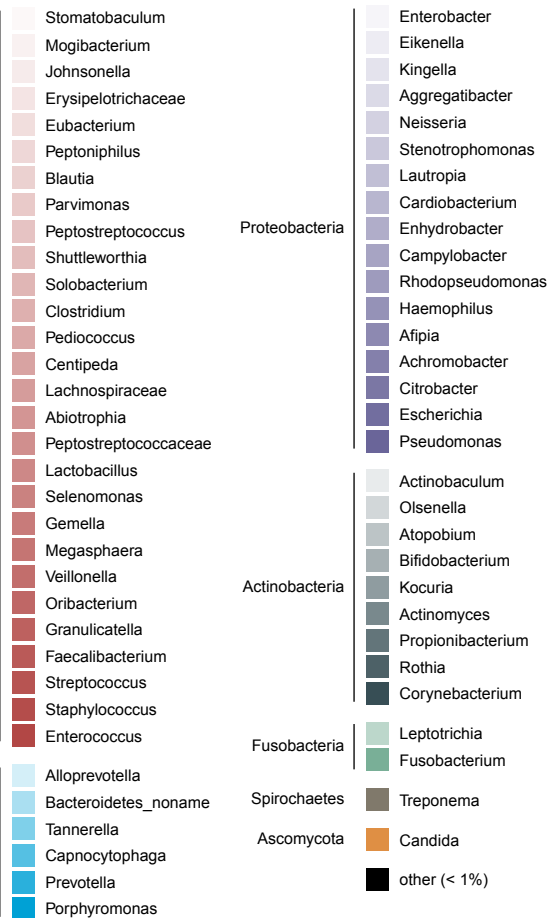

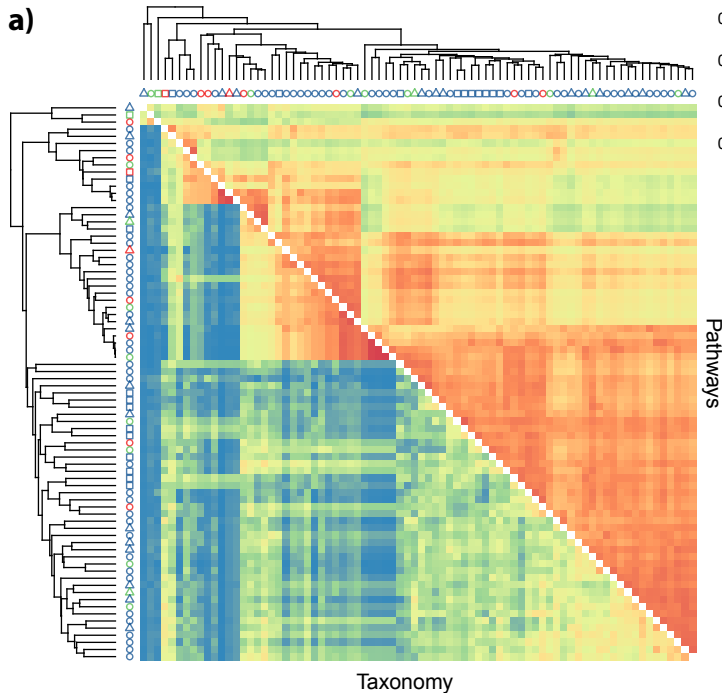

Hospital □ Gaslini ○ Meyer △ OBG

Exacerbation ● normal ● exacerbation ● post\_exacerbation

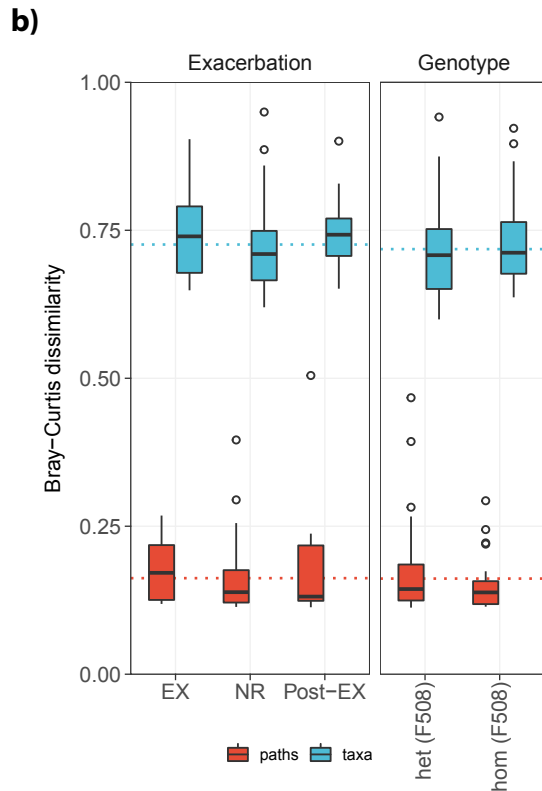

**Table 1: Characteristics of patients enrolled in the study.** ID, study id; Hospital, hospital in which patient has been enrolled; Genotype, CFTR genotype; Status, clinical status (S, stable; SD, severe decliner); Gender, gender; Age, enrollment's age; n, number of samples collected; Exacerbation, yes if an exacerbation event has occurred during the study (no otherwise); FEV<sub>1</sub>, mean value of forced expiratory volume in 1 second plus/minus the standard error on the mean.

| ID              | Hospital                       | Genotype                                | Status       | Gender      | Age         | n  | Exacerbation   | FEV <sub>1</sub> |
|-----------------|--------------------------------|-----------------------------------------|--------------|-------------|-------------|----|----------------|------------------|
| B01             | OBG                            | F508/2183AA>G                           | S            | M           | 27          | 5  | yes            | 37.0 ± 1.70      |
| B02             | OBG                            | F508/N1303K                             | SD           | F           | 26          | 3  | no             | 54.7 ± 3.48      |
| B03             | OBG                            | F508/4016insT                           | S            | F           | 30          | 4  | no             | 55.0 ± 1.08      |
| B06             | OBG                            | F508/F508                               | SD           | F           | 21          | 4  | no             | 60.2 ± 3.42      |
| G10             | Gaslini                        | F508/F508                               | S            | M           | 51          | 4  | no             | 54.0 ± 3.08      |
| G24             | Gaslini                        | F508/F508                               | S            | F           | 49          | 3  | yes            | NA ± NA          |
| G28             | Gaslini                        | F508/F508                               | NA           | F           | 38          | 2  | no             | 42.5 ± 1.50      |
| G30             | Gaslini                        | F508/F508                               | S            | F           | 50          | 1  | no             | 54               |
| G31             | Gaslini                        | G1244E/G42X                             | SD           | F           | 53          | 2  | no             | 41.5 ± 1.50      |
| G34             | Gaslini                        | F508/F508                               | S            | F           | 39          | 1  | no             | 47               |
| M05             | Meyer                          | F508/F508                               | SD           | M           | 32          | 4  | no             | 34.8 ± 0.85      |
| M19             | Meyer                          | F508/F508                               | S            | M           | 24          | 4  | no             | 44.0 ± 2.04      |
| M21             | Meyer                          | F508/N1303K                             | SD           | M           | 27          | 4  | yes            | 51.5 ± 4.35      |
| M22             | Meyer                          | F508/2789+5G->A                         | S            | F           | 29          | 5  | yes            | 50.4 ± 1.03      |
| M23             | Meyer                          | F508/G542X                              | S            | F           | 30          | 4  | yes            | 37.0 ± 1.47      |
| M24             | Meyer                          | F508/F508                               | S            | M           | 32          | 4  | no             | 35.2 ± 0.85      |
| M25             | Meyer                          | F508/296+1G->T                          | SD           | F           | 41          | 4  | no             | 42.5 ± 2.02      |
| M26             | Meyer                          | F508/3849+10                            | SD           | F           | 49          | 5  | yes            | 39.6 ± 1.94      |
| M28             | Meyer                          | F508/N1303K                             | S            | M           | 23          | 4  | no             | 39.0 ± 1.08      |
| M29             | Meyer                          | F508/G542X                              | S            | F           | 12          | 4  | no             | 43.5 ± 3.75      |
| M31             | Meyer                          | F508/F508                               | SD           | F           | 11          | 3  | yes            | 32.7 ± 4.41      |
| M33             | Meyer                          | F508/G85E                               | SD           | F           | 13          | 5  | yes            | 35.4 ± 5.78      |
| <b>Total:22</b> | Gaslini:6<br>Meyer:12<br>OBG:4 | het(F508):47<br>hom(F508):29<br>other:2 | S:12<br>SD:9 | F:15<br>M:7 | 32.1 ± 2.73 | 79 | no:14<br>yes:8 | 43.5 ± 1.09      |

**Table 2: Permutational multivariate analysis of variance (PERMANOVA) on both taxonomic distribution and metabolic pathways.** The analysis based on taxonomic distribution was reported in the upper part of the table whereas the analysis based on metabolic pathways was reported at the bottom. Df, degrees of freedom; SumOfSqs, sum of squares;  $R^2$ , r-squared statistic (reported as proportion); F, F-statistic; Pr(>F), p-value associated to the F-statistic. Significant effects, namely those reporting a p-value lower than 0.05, were reported in bold.

|                        | Df        | SumOfSqs     | $R^2$       | F           | Pr(>F)        |
|------------------------|-----------|--------------|-------------|-------------|---------------|
| <i>Taxonomy</i>        |           |              |             |             |               |
| <b>Exacerbation</b>    | <b>2</b>  | <b>0.68</b>  | <b>0.03</b> | <b>1.91</b> | <b>0.0300</b> |
| <b>Genotype</b>        | <b>1</b>  | <b>0.77</b>  | <b>0.03</b> | <b>4.30</b> | <b>0.0020</b> |
| <b>Sample</b>          | <b>18</b> | <b>11.97</b> | <b>0.52</b> | <b>3.74</b> | <b>0.0010</b> |
| FEV <sub>1</sub> value | 1         | 0.27         | 0.01        | 1.53        | 0.1349        |
| Days                   | 1         | 0.28         | 0.01        | 1.58        | 0.1229        |
| Exacerbation:Genotype  | 1         | 0.11         | 0.01        | 0.64        | 0.7642        |
| Residual               | 49        | 8.72         | 0.38        |             |               |
| <i>Pathway</i>         |           |              |             |             |               |
| <b>Exacerbation</b>    | <b>2</b>  | <b>0.20</b>  | <b>0.04</b> | <b>2.37</b> | <b>0.0220</b> |
| <b>Genotype</b>        | <b>1</b>  | <b>0.14</b>  | <b>0.03</b> | <b>3.42</b> | <b>0.0080</b> |
| <b>Sample</b>          | <b>18</b> | <b>2.43</b>  | <b>0.48</b> | <b>3.20</b> | <b>0.0010</b> |
| FEV <sub>1</sub> value | 1         | 0.09         | 0.02        | 2.14        | 0.0989        |
| Days                   | 1         | 0.05         | 0.01        | 1.26        | 0.2458        |
| Exacerbation:Genotype  | 1         | 0.08         | 0.02        | 1.96        | 0.1169        |
| Residual               | 49        | 2.07         | 0.41        | NA          | NA            |
