1 **Title**

2 **Taxonomic variability over functional stability in the microbiome of**  
3 **Cystic Fibrosis patients chronically infected by *Pseudomonas***  
4 ***aeruginosa***

5  
6 Giovanni Bacci<sup>1</sup>, Giovanni Taccetti<sup>2</sup>, Daniela Dolce<sup>2</sup>, Federica Armanini<sup>3</sup>, Nicola Segata<sup>3</sup>,  
7 Francesca Di Cesare<sup>1</sup>, Vincenzina Lucidi<sup>4</sup>, Ersilia Fiscarelli<sup>4</sup>, Patrizia Morelli<sup>5</sup>, Rosaria Casciaro<sup>5</sup>,  
8 Anna Negroni<sup>6</sup>, Alessio Mengoni<sup>1</sup>, and Annamaria Bevivino<sup>6\*</sup>

9  
10 <sup>1</sup>Department of Biology, University of Florence, Sesto Fiorentino, 50019, Florence, Italy,

11 <sup>2</sup>Cystic Fibrosis Center, Anna Meyer Children's University Hospital, Department of Pediatrics  
12 Medicine, Florence,  
13 50139, Italy

14 <sup>3</sup>Centre for Integrative Biology, University of Trento, Trento, 38122, Italy

15 <sup>4</sup>Children's Hospital and Research Institute Bambino Gesù, Rome, 00165, Italy

16 <sup>5</sup>Cystic Fibrosis Center, IRCCS G. Gaslini Institute, Department of Pediatrics, Genoa, 16147, Italy

17  
18 <sup>6</sup>Department for Sustainability, Italian National Agency for New Technologies, Energy and  
19 Sustainable Economic Development, ENEA, 00123 Rome, Italy

20  
21 \* Corresponding author

22 Annamaria Bevivino, Department for Sustainability, ENEA, Via Anguillarese 301 – 00123 Rome,  
23 Italy. Email: [annamaria.bevivino@enea.it](mailto:annamaria.bevivino@enea.it)

24

## 25 **Abstract**

26 Although the cystic fibrosis (CF) lung microbiome has been characterized in several studies, little is  
27 still known about the functions harboured by those bacteria, and how they change with disease  
28 status and antibiotic treatment. The aim of this study was to investigate the taxonomic and  
29 functional temporal dynamics of airways microbiome in a cohort of CF patients. Multiple sputum  
30 samples were collected over 15 months from 22 patients with chronic *P. aeruginosa* infection, for a  
31 total of 79 samples. DNA extracted from samples was subjected to shotgun metagenomic  
32 sequencing allowing either strain-level taxonomic profiling and assessment of the functional  
33 metagenomic repertoire. High inter-patient taxonomic heterogeneity was found with short-term  
34 compositional changes during exacerbations and following antibiotic treatment. Each patient  
35 exhibited distinct sputum microbial communities at the taxonomic level, and strain-specific  
36 colonization of traditional CF pathogens, including *P. aeruginosa*, and emerging pathogens. Sputum  
37 microbiome was found to be extraordinarily resilient following antibiotic treatment, with rapid  
38 recovery of taxa and metagenome-associated gene functions. In particular, a large core set of genes,  
39 including antibiotic resistance genes, were shared across patients despite observed differences in  
40 clinical status or antibiotic treatment, and constantly detected in the lung microbiome of all subjects  
41 independently from known antibiotic exposure, suggesting an overall microbiome-associated  
42 functions stability despite taxonomic fluctuations of the communities.

43 **IMPORTANCE** While the dynamics of CF sputum microbial composition were highly patient-  
44 specific, the overall sputum metagenome composition was stable, showing a high resilience along  
45 time and antibiotic exposure. The high degree of redundancy in the CF lung microbiome could  
46 testify ecological aspects connected to the disease that were never considered so far, as the large  
47 core-set of genes shared between patients despite observed differences in clinical status or antibiotic

48 treatment. Investigations on the actual functionality (e.g. by metatranscriptomics) of the identified  
49 core-set of genes could provide clues on genetic function of the microbiome to be targeted in future  
50 therapeutic treatments.

51

52 **Key words:** cystic fibrosis; lung microbiome; longitudinal studies; metagenome composition;  
53 antibiotic resistance genes

54

## 55 **Introduction**

56 Bacterial lung infections reduce life expectancy in most individuals with cystic fibrosis (CF) (1).  
57 Sputum bacterial loads remain equally high both during periods of clinical stability and during  
58 pulmonary exacerbations (2), the latter of which contribute to the irreversible decline of lung  
59 function. Though much is known about microbes that cause respiratory infections in CF (3), how  
60 microbes contribute to exacerbations is still poorly understood. In the past years, studies employing  
61 DNA-based analyses of the airway microbiota of CF patients have reported somewhat discordant  
62 results. Indeed, while some studies showed a largely stable airway microbiota during clinical change  
63 and antibiotic treatment (4), other did not, suggesting changes the involvement of some microbial  
64 taxa in exacerbation (5, 6). Most of these used 16S rRNA gene sequencing, yielding the identities  
65 and relative abundances of the taxa present (i.e., the microbiota), but without providing any strain-  
66 level or functional (meaning based on functional genes) information (i.e., the metagenome) (7).  
67 These latter characteristics are particularly relevant for studying host-microbiome interactions.  
68 Indeed, defining the dynamics of individual microbial strains provides important information  
69 regarding how specific sub-lineages of pathogens persist and relate to clinical change. On the other  
70 hand, studying the microbial genetic repertoire, e.g. antibiotic resistance and virulence-related

71 genes, with respect to clinical status or treatment can identify mechanisms of microbial persistence  
72 and pathogenesis (8–10). Until now, few longitudinal studies, with a limited number of patients,  
73 focusing only on CF airway microbiota have been performed (11–13). Moreover, studies on the  
74 complete CF microbiome (microbiota and metagenome) are few and on a limited number of patients  
75 (13–16) or focused on specific metabolic functions (17). In this work, we studied the temporal  
76 dynamics of CF sputum microbiomes, focusing on patients with moderate-severe lung disease,  
77 chronically infected by *Pseudomonas aeruginosa*. In a previous work (18), chronic infection with *P.*  
78 *aeruginosa* has been found to be associated with dysbiosis in the lungs of patients with CF. The  
79 authors suggested that the dominance of one species remodels the lung microbiota and may promote  
80 severity of CF lung disease. A more detailed taxonomic and functional analysis could help  
81 elucidating the mechanisms leading to chronic infection with *P. aeruginosa* and the microbial  
82 factors that contribute to the global changes of their lung microbiome. In the present study, a  
83 shotgun metagenomic approach was used (19) to detect the entire sputum microbial genomic  
84 repertoire down to the strain level (20, 21). A cohort of 22 patients with moderate-severe lung  
85 disease, grouped according to homozygosity versus heterozygosity for  $\Delta F508$  (also known as  
86 F508del) in the CFTR gene and chronically infected with *P. aeruginosa*, was selected and followed  
87 over 15 months during which 8 patients underwent exacerbation events. We aimed to determine the  
88 composition of sputum microbiomes for these patients when longitudinally sampled during periods  
89 of stability and exacerbation, defining the relationship between clinical status, sputum microbial  
90 metabolic gene repertoire, and the antibiotic-resistance (AR) gene composition of sputum bacterial  
91 community, providing a previously unknown, high-resolution view of CF sputum microbiome  
92 dynamics.  
93

## 94 **Results**

### 95 **Patients and sampling**

96 Twenty-two patients with CF were enrolled (15 females and seven males) who had moderate-severe  
97 lung disease ( $30 < \%FEV_1 < 70$ ) and were chronically infected by *P. aeruginosa*, according to the  
98 Leeds criteria (22). During the study period, patients were treated with maintenance antibiotics  
99 (aerosol) and only a subset ( $n = 8$ ) received clinical additional antibiotics (oral or/and intravenous)  
100 for a pulmonary exacerbation (CFPE) (Table 1 and supplementary materials Table S1). Among the  
101 22 subjects, 8 were diagnosed with exacerbations during the study period. In total, 79 sputum  
102 samples were collected and analyzed using shotgun metagenomic sequencing.

103

### 104 **Airway microbiomes are taxonomically distinct and show patient-specific strain colonization**

105 The overall taxonomic representation of the microbiomes from the 79 samples is reported in Fig. 1a  
106 and 1b, whereas a summary of obtained reads per sample was reported in supplementary materials  
107 Table S2. Firmicutes, Proteobacteria, Bacteroidetes, and Actinobacteria were the most represented  
108 phyla. A high relative abundance of the “classical” CF bacterial signatures (taxa), such as  
109 *Staphylococcus aureus* and *Pseudomonas aeruginosa*, and non-traditional CF taxa, such as *Rothia*  
110 *mucilaginosa*, and *Prevotella melaninogenica* (all present in the top-10 species within each phylum,  
111 Fig. 1b), was found. These species, indeed, represent the 49% of all detected taxa as reported in  
112 supplementary materials Table S3.

113 Although principal coordinates analysis showed that subjects did not cluster based on treatment  
114 events and/or genotype (Fig. 2a), the PERMANOVA analysis (Table 2) reported a significant effect  
115 of both factors. The  $R^2$  values, namely the proportion of variance explained by the factor considered,  
116 were very low (Table 2,  $R^2 = 0.03$  for both factors,  $p$ -values  $< 0.05$ ) probably due to intra-patient

117 heterogeneity. CFTR genotype did not influence the effect of antibiotic treatment (viz. exacerbation)  
118 on sputum microbiota, nor vice versa (p-value > 0.05, treatment-genotype interaction effect).  
119 Subject effect was predominant with an  $R^2$  value of 0.52. A high fraction (more than 50%) of the  
120 total variance can be thus explained by inter-subject variation. Neither FEV<sub>1</sub> nor time showed any  
121 significant relationship with taxonomy or functional profile (Table 2).

122 We then performed a strain-level analysis of the sputum microbiomes. This analysis demonstrated,  
123 in samples from the same patient but at different time points, that bacterial lineages were in general,  
124 closely related and tightly clustered together, confirming a patient-specific bacterial colonization  
125 (Fig. 3 and supplementary materials Fig. S1).

126 Alpha diversity analyses were consistent with the results above. Bacterial diversity measures  
127 (Shannon and inverse Simpson indices) varied according to clinical status, genotype, and subject  
128 (Fig. 4a, supplementary materials Fig. S2 and Table S4). Samples collected during clinical  
129 treatments exhibited lower microbial diversity than samples collected at either baseline or recovery  
130 visits, highlighting the role of clinical treatments in perturbing CF lung communities (supplementary  
131 materials Table S5).

132

### 133 **Airway microbiomes are functionally consistent and show subject-specific distribution** 134 **patterns**

135 The results of functional metagenomic analyses were consistent with the taxonomic findings  
136 described above. Exacerbation events and patient genotype significantly impacted pathway  
137 distribution (Table 2,  $R^2$  values of 0.04 and 0.03 respectively, p-values < 0.05), though with less an  
138 effect than that of subject ( $R^2 = 0.48$ ). The sample distribution according to the ordination analysis  
139 (PCoA) was very heterogeneous with no sharp differences according to genotypes or exacerbation  
140 events. Alpha diversity dropped significantly in samples collected during exacerbation events, but

141 the drop was significant only considering the inverse Simpson index (p-value = 0.036, Fig. 4b and  
142 supplementary materials Table S4). Overall, the pathway distribution was more consistent with  
143 respect to the taxonomic one, with biosynthetic pathways being the most represented functional  
144 category (Fig. 5, supplementary materials Fig. S2 and Table S5). Pathways were mainly detected in  
145 members of the phyla Firmicutes and Proteobacteria, followed by Bacteroidetes and Actinobacteria.  
146 Even if these results confirmed the results from the analysis of the taxonomic distribution, metabolic  
147 pathways showed a more consistent distribution across samples. Indeed, the beta-diversity analysis  
148 on both taxonomic and functional distribution showed a lower similarity based on taxonomy in  
149 respect with pathways (Supplementary materials Table S6, Fig. 6a and 6b). These results were  
150 additionally confirmed by the differential abundance analysis. For contrasts made within each  
151 genotype, only 40 pathways reported significant differences across exacerbation statuses (p-values <  
152 0.05 and  $|\log(\text{fold-change})| > 5$ ) all in the homozygote group (Supplementary materials Fig. S3 and  
153 Table S7), whereas, considering all samples together, no pathway was found to be more abundant in  
154 one condition in respect with another (data not shown). These results confirmed the extraordinary  
155 resilience of the CF microbiome evident at the taxonomic level is also exhibited from a functional  
156 perspective, indicating that neither clinical change nor antibiotic treatments are accompanied by  
157 changes in sputum microbial functions; for example, antibiotics do not appear to select for or against  
158 specific functions. To test this specifically, we focused on known antibiotic resistance genes.

159

### 160 **Antibiotic resistance genes through exacerbation events and treatments**

161 Similar to the pathway analysis reported above, antibiotic resistance genes (ARG) were inspected in  
162 relation to treatment events. Only six genes were found to be affected by an exacerbation condition,  
163 all regarding samples from patients heterozygous for  $\Delta F508$  whereas, as found for metabolic

164 pathways, no gene was significantly impacted in terms of abundance by antibiotic treatment when  
165 considering all samples at once (supplementary materials Fig. S4 and Table S8). A similar approach  
166 was used to inspect the effect of antibiotic treatment on ARG distribution. ARG were inspected in  
167 relation to the antibiotic treatments reported in supplementary materials Table S1. The class of each  
168 antibiotic was correlated to the presence (and the abundance) of genes that may, in principle, confer  
169 resistance to antibiotics from the corresponding class. Differential abundance analyses were  
170 performed for each classes of antibiotics that was used in this study and results obtained were  
171 reported in supplementary materials Fig. S5 and Table S9. Only 11 genes were found to be affected  
172 by antibiotic intake in different ways. Indeed, 8 out of 11 reported a reduction of abundance during  
173 the treatment whereas the remaining 3 reported an increased abundance in respect with antibiotic  
174 intake. Results obtained confirmed the high resilience of the gene composition of CF lung  
175 microbiome. The relationship between presence of ARGs with antibiotic treatment was also  
176 explored. Results showed a large group of ARGs present in most of the samples and that the  
177 antibiotic treatment used in each sample was mirrored by the representation of the ARG classes  
178 (Supplementary materials Fig. S6 and Fig. S7).

## 179 **Discussion**

180 Longitudinal studies provide important information on the stability and dynamics of microbial  
181 ecosystems (23). Here, we investigated the temporal dynamics of the CF sputum microbiome using  
182 shotgun metagenomics, including both periods of stability and respiratory exacerbations. The  
183 sputum microbiomes of CF patients were highly patient-specific and were substantially impacted  
184 both by the host and its lifestyle, suggesting the host has one of the most important determinants of  
185 sputum microbiome composition. Indeed, there was less variation within the same individual at  
186 different time points than between different individuals at the same time point, proving some degree



187 of temporal stability of an individual's sputum microbiome, as indicated by the lack of a time effect  
188 on the taxonomic distribution of microbiomes. The predominant taxa detected in sputa of CF  
189 patients exhibited extraordinary resilience, as demonstrated by the presence of the same strains of  
190 several species during the entire study period. While similar conclusions have been drawn from  
191 previous studies using both culture and 16S rRNA gene profiling, these studies failed to report a  
192 comprehensive, taxonomy-wide view of strain dynamics due to the limitations of these approaches  
193 (4, 6, 24). Carmody and colleagues showed a relatively stable sputum community that was often  
194 altered during period of exacerbation even in the absence of viral infection or antibiotic only in a  
195 small group of patients (5). A similar result was shown in the work from Fodor and colleagues (4)  
196 where, though occasional short-term compositional changes in the airway microbiota were found,  
197 the main taxonomic signatures of CF disease were highly stable. Even in other pulmonary diseases,  
198 such as non-cystic fibrosis bronchiectasis, respiratory sample bacterial communities showed a  
199 conserved structure for long period of time, as showed in the work by Cox and colleagues where  
200 patients were followed for a six-month period (24). In our study a notable exception was found for  
201 *Rothia mucilaginosa*. In fact, in contrast with other studies where this species was rarely identified  
202 (25–27), in our samples it was detected in high relative abundance. This finding may suggest a  
203 potential involvement of *R. mucilaginosa* in CF microbiome dynamics and pathogenicity, which  
204 deserves further attention.

205 Antibiotic exposure did not result in durable, persistent changes in sputum microbiota; the main taxa  
206 linked to CF infection were still present even after aggressive antibiotic treatment. From a  
207 taxonomic perspective, samples coming from the same patient clustered together, highlighting the  
208 role of the host in bacterial strain selection during the baseline but even during (and after)  
209 exacerbation events. Strain selection can be indeed influenced by a number of environmental factors  
210 (such as pH level and/or availability of nutrients) that are specific of the lung of a given host and

211 cannot be determined *a-priori*. Despite this patient-specific colonization, sputum taxonomic  
212 composition differed significantly from one subject to another even when sampled at the same time.  
213 Conversely, microbial functional genetic pathways were more homogeneous across patients. This  
214 high conservation could indicate common features of the CF lung environment itself, such as mucus  
215 composition, nutrient availability, and oxygen levels, which can be broadly similar across patients  
216 with a similar clinical status. Such interpretation is consistent with the concept that the function of a  
217 biotic community is more conserved than the presence of single members due to functional  
218 redundancy of different microbial taxa (28). In fact, though the overall sputum microbiome in our  
219 study population included large set of microorganisms, the main functions detected are similar  
220 across all patients. From this point of view the airway microbiome can be considered as performing  
221 a similar “ecosystem service”, irrespective of the taxonomy present as pointed out by various  
222 authors in other environments (28, 29). The finding that CFTR genotypes relate with different  
223 representation in some pathways, may suggest that the airways microbiome is influenced by the type  
224 of CFTR alteration. However, this hypothesis deserves further attention to clarify a putative role of  
225 microbial pathways with respect to CFTR genotype and viceversa. Despite a clear effect of  
226 antibiotic treatment during (and after) exacerbation periods, the community structure is always  
227 recovered with the main pathogenic taxa emerging again. This effect is confirmed by the correlation  
228 of ARG distribution and antibiotic intake. Patients subjected to a given antibiotic treatment did not  
229 seem to select bacteria resistant to the antibiotic used but the detection of a particular mechanism  
230 seems to be distributed in almost all patients regardless of the treatment. An evidence of functional  
231 stability of the lung microbiota was previously reported in other works not concerning CF disease  
232 (30, 31). Both works focused their attention on the gut microbiome of obese and healthy individuals  
233 (human and mouse) reporting a considerable metabolic redundancy. This high degree of redundancy  
234 in the gut microbiome supported a more ecological view where subjects can be considered to some

235 extent as different ecological niches, inhabited by unique collections of microbial phylotypes, but  
236 sharing the same set of genes. This concept can be applied to our cohort of patients, whose lung  
237 microbiome was taxonomically variable over time and among individuals (though all chronically  
238 infected by the same species, *P. aeruginosa*), but where it was possible to identify a core set of  
239 metabolic-related gene features. This functional conservation may thus be needed by the whole  
240 community and patients can be seen as multiple micro-environments inhabited by a peculiar set of  
241 strains, which share the same functions. Investigations on the actual functionality (e.g. by  
242 metatranscriptomics) of the identified core-set of genes could provide clues on genetic function of  
243 the microbiome to be targeted in future therapeutic treatments (10). Additionally, the observed  
244 relations of pathway representation with CFTR genotype, though needing to be validated in larger  
245 studies, could offer possible opportunities for treating patients by targeting some CFTR genotype-  
246 related microbial metabolism. In conclusion, the temporal dynamics of the sputum microbiome in  
247 the largest cohort of patients with CF revealed analysed so far, showed patient-specific signatures of  
248 the airway microbiome at strain-level, lack of variation in the microbiome across pulmonary  
249 exacerbations, and a core set of antibiotic resistance genes that did not vary by antibiotic intake.

## 250 **Materials and Methods**

### 251 **Ethics Statement**

252 The study was approved by the Ethics Committees of Children's Hospital and Research Institute  
253 Bambino Gesù (Rome, Italy), Cystic Fibrosis Center, Anna Meyer Children's University Hospital  
254 (Florence, Italy) and G. Gaslini Institute (University of Genoa, Genoa, Italy) [Prot. N. 681 CM of  
255 November 2, 2012; Prot. N. 85 of February 27, 2014; Prot. N. FCC 2012 Partner 4-IGG of  
256 September 18, 2012]. All participants provided written informed consent before the enrollment in  
257 the study. All sputum specimens were produced voluntarily. All procedures were performed in

258 agreement with the “Guidelines of the European Convention on Human Rights and Biomedicine for  
259 Research in Children” and the Ethics Committee of the three CF Centers involved. All measures  
260 were obtained and processed ensuring patient data protection and confidentiality.

261

## 262 **Characteristics of enrolled patients**

263 Twenty-two adolescents and adults with moderate-severe lung disease and carrying the  $\Delta F508$   
264 mutation were enrolled in the study between October 2014 and March 2015 (Table 1). The inclusion  
265 criteria are described in detail in the supplementary methods. Clinical status at the time of collection  
266 was designated as *baseline* (BL), when clinically stable and at their clinical and physiological  
267 baseline, *on treatment* (TR), at exacerbation-associated antibiotic treatments, and *at recovery* (RC),  
268 upon completion of antibiotic treatment. Subjects were treated according to current standards of care  
269 with periodical microbiological controls (32) with at least four microbiological controls per year (2).  
270 At each visit, clinical data collection and microbiological status (colonizing pathogens with  
271 available cultivation protocols) were performed according to the European CF Society standards of  
272 care (33). Forced expiratory volume in 1 second as a percentage of predicted (%FEV<sub>1</sub>) is a key  
273 outcome of monitoring lung function in CF (34). FEV<sub>1</sub> values were measured according to the  
274 American Thoracic Society and European Respiratory Society standards (32). CFTR genotype, sex,  
275 age, and antibiotic treatment for each patient were reported in (Table 1 and supplementary materials  
276 Table S1). During serial sampling, data (antibiotic usage and spirometry) were collected. A total of  
277 79 sputum sample were collected and DNA extraction were performed as reported in supplementary  
278 methods.

279

## 280 **Bioinformatic analyses**

281 Sequence quality was ensured by trimming reads using StreamingTrim 1.0 (35), with a quality  
282 cutoff of 20. Bowtie2 (36) was used to screen out human-derived sequences from metagenomic data  
283 with the latest version of the human genome available in the NCBI database (GRCh38) as reference.  
284 Sequences displaying a concordant alignment (mate pair that aligns with the expected relative mate  
285 orientation and with the expected range of distances between mates) against the human genomes  
286 were then removed from all subsequent analyses. Metabolic and regulatory patterns were estimated  
287 using HUMAnN2 (37) and considering only those pathways with a coverage value  $\geq 80\%$ , whereas  
288 the taxonomic microbial community composition was assessed using MetaPhlan2 (38). Reads were  
289 assembled into contigs using the metaSPAdes microbial assembler (39) with automatic k-mer length  
290 selection. To establish an airway microbiome gene catalog (7) we first removed contigs smaller than  
291 500bp and then used prodigal in Anonymous mode (40), as suggested by the author of the tool, to  
292 predict open reading frames (ORFs). Translated protein sequences obtained from assembled contigs  
293 were classified using eggNOG mapper against the bactNOG database (41). Each protein was  
294 classified according to its best hit with an e-value lower than 0.001 as suggested in (42). The CARD  
295 database (43) was used in combination to the Resistance Gene Identifier (RGI, version 4.0.3) to  
296 inspect the distribution of antibiotic resistance gene (AR genes). Genes predicted within each  
297 metagenome were quantified using the number of reads that mapped against metagenomic contigs  
298 obtained for each sample. Reads were mapped back to contigs using Bowtie2 (36) and the number  
299 of reads mapping each ORF was obtained with the bedtools command “multicov” (version 2.26.0).  
300 To quantify gene content across different samples, genes were collapsed using the bestOG given by  
301 eggNOG mapper by summing together the number of reads that mapped genes with the same  
302 annotation. The same approach was used to quantify AR genes predicted with RGI but this time the  
303 unique identifier provided by CARD was used to collapse counts.

304 Strain characterization was performed using StrainPhlAn (20). Sequence variants for each organism  
305 detected were assessed against the MetaPhlAn2 (38) marker genes and a tree has been generated  
306 including all samples in which the organism was found at least in one time point. Since all  
307 organisms detected had at least one reference genome available in the RefSeq database, the most  
308 recent version of their genome was downloaded and added to the tree.

## 309 **Acknowledgments**

310 We greatly acknowledge Professor Luke Hoffman (University of Washington, School of Medicine,  
311 Seattle, WA, USA) for critically reading and reviewing the earlier drafts of the manuscript. We also  
312 thank the Italian Cystic Fibrosis Research Foundation (FCC) (<https://www.fibrosicisticaricerca.it>)  
313 for financial support and administrative tasks, and the medical student Marta Maggisano  
314 (Sant'Andrea Hospital, Sapienza University of Rome, Rome, Italy) for the stimulating discussion.  
315 We would like to express their gratitude to Ricciotti Gabriella (Children's Hospital and Research  
316 Institute Bambino Gesù, Rome), Dr. Tuccio Vanessa (Children's Hospital and Research Institute  
317 Bambino Gesù, Rome) and Dr. Campana Silvia (Cystic Fibrosis Center, Anna Meyer Children's  
318 University Hospital, Department of Pediatrics Medicine, Florence) for their technical support.

319

## 320 **References**

- 321 1. Knapp EA, Fink AK, Goss CH, Sewall A, Ostrenga J, Dowd C, Elbert A, Petren KM,  
322 Marshall BC. 2016. The Cystic Fibrosis Foundation Patient Registry. Design and methods of  
323 a national observational disease registry. *Ann Am Thorac Soc* 13:1173–1179.
- 324 2. Flume PA, Mogayzel PJ, Robinson KA, Goss CH, Rosenblatt RL, Kuhn RJ, Marshall BC,  
325 Bujan J, Downs A, Finder J, Goss C, Gutierrez H, Hazle L, Lester M, Quittell L, Sabadosa K,  
326 Vender RL, White TB, Willey-Courand DB, Saldanha I, Oyegunle M, Shankar MB, Mckoy  
327 N, Sengupta S, Odelola OA, Waybright S. 2009. Cystic fibrosis pulmonary guidelines:  
328 Treatment of pulmonary exacerbations. *Am J Respir Crit Care Med* 180:802–808.
- 329 3. Huang YJ, LiPuma JJ. 2016. The Microbiome in Cystic Fibrosis. *Clin Chest Med* 37:59–67.

- 330 4. Fodor AA, Klem ER, Gilpin DF, Elborn JS, Boucher RC, Tunney MM, Wolfgang MC. 2012.  
331 The Adult Cystic Fibrosis Airway Microbiota Is Stable over Time and Infection Type, and  
332 Highly Resilient to Antibiotic Treatment of Exacerbations. *PLoS One* 7:e45001.
- 333 5. Carmody LA, Zhao J, Schloss PD, Petrosino JF, Murray S, Young VB, Li JZ, LiPuma JJ.  
334 2013. Changes in Cystic Fibrosis Airway Microbiota at Pulmonary Exacerbation. *Ann Am*  
335 *Thorac Soc* 10:179–187.
- 336 6. Carmody LA, Zhao J, Kalikin LM, LeBar W, Simon RH, Venkataraman A, Schmidt TM,  
337 Abdo Z, Schloss PD, LiPuma JJ. 2015. The daily dynamics of cystic fibrosis airway  
338 microbiota during clinical stability and at exacerbation. *Microbiome* 3:12.
- 339 7. Qin J, Li R, Raes J, Arumugam M, Burgdorf KS, Manichanh C, Nielsen T, Pons N, Levenez  
340 F, Yamada T, Mende DR, Li J, Xu J, Li S, Li D, Cao J, Wang B, Liang H, Zheng H, Xie Y,  
341 Tap J, Lepage P, Bertalan M, Batto J-M, Hansen T, Le Paslier D, Linneberg A, Nielsen HB,  
342 Pelletier E, Renault P, Sicheritz-Ponten T, Turner K, Zhu H, Yu C, Li S, Jian M, Zhou Y, Li  
343 Y, Zhang X, Li S, Qin N, Yang H, Wang J, Brunak S, Doré J, Guarner F, Kristiansen K,  
344 Pedersen O, Parkhill J, Weissenbach J, Bork P, Ehrlich SD, Wang J. 2010. A human gut  
345 microbial gene catalogue established by metagenomic sequencing. *Nature* 464:59–65.
- 346 8. Bacci G, Mengoni A, Fiscarelli E, Segata N, Taccetti G, Dolce D, Paganin P, Morelli P,  
347 Tuccio V, De Alessandri A, Lucidi V, Bevivino A. 2017. A different microbiome gene  
348 repertoire in the airways of cystic fibrosis patients with severe lung disease. *Int J Mol Sci*  
349 18:1654.
- 350 9. Franzosa EA, Morgan XC, Segata N, Waldron L, Reyes J, Earl AM, Giannoukos G, Boylan  
351 MR, Ciulla D, Gevers D, IZard J, Garrett WS, Chan AT, Huttenhower C. 2014. Relating the  
352 metatranscriptome and metagenome of the human gut. *Proc Natl Acad Sci* 111:E2329–  
353 E2338.
- 354 10. Bevivino A, Bacci G, Drevinek P, Nelson MT, Hoffman LR, Mengoni A. 2019. Deciphering  
355 the Ecology of Cystic Fibrosis Bacterial Communities: Towards Systems-Level Integration.  
356 *Trends Mol Med* in press.
- 357 11. Zhao J, Schloss PD, Kalikin LM, Carmody LA, Foster BK, Petrosino JF, Cavalcoli JD,  
358 VanDevanter DR, Murray S, Li JZ, Young VB, LiPuma JJ. 2012. Decade-long bacterial  
359 community dynamics in cystic fibrosis airways. *Proc Natl Acad Sci* 109:5809–5814.
- 360 12. Delhaes L, Monchy S, Fréalle E, Hubans C, Salleron J, Leroy S, Prevotat A, Wallet F,  
361 Wallaert B, Dei-Cas E, Sime-Ngando T, Chabé M, Viscogliosi E. 2012. The airway  
362 microbiota in cystic fibrosis: A complex fungal and bacterial community-implications for  
363 therapeutic management. *PLoS One* 7:e36313.
- 364 13. Whelan FJ, Heirali AA, Rossi L, Rabin HR, Parkins MD, Surette MG. 2017. Longitudinal  
365 sampling of the lung microbiota in individuals with cystic fibrosis. *PLoS One* 12:e0172811.
- 366 14. Willner D, Daly J, Whiley D, Grimwood K, Wainwright CE, Hugenholtz P. 2012.  
367 Comparison of DNA extraction methods for microbial community profiling with an  
368 application to pediatric bronchoalveolar lavage samples. *PLoS One* 7:e34605.
- 369 15. Lim YW, Evangelista JS, Schmieder R, Bailey B, Haynes M, Furlan M, Maughan H,  
370 Edwards R, Rohwer F, Conrad D. 2014. Clinical insights from metagenomic analysis of  
371 sputum samples from patients with cystic fibrosis. *J Clin Microbiol* 52:425–437.

- 372 16. Willner D, Haynes MR, Furlan M, Hanson N, Kirby B, Lim YW, Rainey PB, Schmieder R,  
373 Youle M, Conrad D, Rohwer F. 2012. Case studies of the spatial heterogeneity of DNA  
374 viruses in the cystic fibrosis lung. *Am J Respir Cell Mol Biol* 46:127–31.
- 375 17. Whiteson KL, Meinardi S, Lim YW, Schmieder R, Maughan H, Quinn R, Blake DR, Conrad  
376 D, Rohwer F. 2014. Breath gas metabolites and bacterial metagenomes from cystic fibrosis  
377 airways indicate active pH neutral 2,3-butanedione fermentation. *ISME J* 8:1247–58.
- 378 18. Boutin S, Graeber SY, Stahl M, Dittrich AS, Mall MA, Dalpke AH. 2017. Chronic but not  
379 intermittent infection with *Pseudomonas aeruginosa* is associated with global changes of the  
380 lung microbiome in cystic fibrosis. *Eur Respir J* 50.
- 381 19. Quince C, Walker AW, Simpson JT, Loman NJ, Segata N. 2017. Shotgun metagenomics,  
382 from sampling to analysis. *Nat Biotechnol* 35:833–844.
- 383 20. Truong DT, Tett A, Pasolli E, Huttenhower C, Segata N. 2017. Microbial strain-level  
384 population structure and genetic diversity from metagenomes 626–638.
- 385 21. Scholz M, Ward D V., Pasolli E, Tolio T, Zolfo M, Asnicar F, Truong DT, Tett A, Morrow  
386 AL, Segata N. 2016. Strain-level microbial epidemiology and population genomics from  
387 shotgun metagenomics. *Nat Methods* 13:435–438.
- 388 22. Proesmans M, Balinska-Miskiewicz W, Dupont L, Bossuyt X, Verhaegen J, Høiby N, de  
389 Boeck K. 2006. Evaluating the “Leeds criteria” for *Pseudomonas aeruginosa* infection in a  
390 cystic fibrosis centre. *Eur Respir J* 27:937–943.
- 391 23. Faust K, Lahti L, Gonze D, de Vos WM, Raes J. 2015. Metagenomics meets time series  
392 analysis: unraveling microbial community dynamics. *Curr Opin Microbiol* 25:56–66.
- 393 24. Cox MJ, Turek EM, Hennessy C, Mirza GK, James PL, Coleman M, Jones A, Wilson R,  
394 Bilton D, Cookson WOC, Moffatt MF, Loebinger MR. 2017. Longitudinal assessment of  
395 sputum microbiome by sequencing of the 16S rRNA gene in non-cystic fibrosis  
396 bronchiectasis patients. *PLoS One* 12:1–17.
- 397 25. Zemanick ET, Wagner BD, Robertson CE, Ahrens RC, Chmiel JF, Clancy JP, Gibson RL,  
398 Harris WT, Kurland G, Laguna TA, McColley SA, McCoy K, Retsch-Bogart G, Sobush KT,  
399 Zeitlin PL, Stevens MJ, Accurso FJ, Sagel SD, Harris JK. 2017. Airway microbiota across  
400 age and disease spectrum in cystic fibrosis. *Eur Respir J*.
- 401 26. Carmody LA, Caverly LJ, Foster BK, Rogers MAM, Kalikin LM, Simon RH, VanDevanter  
402 DR, LiPuma JJ. 2018. Fluctuations in airway bacterial communities associated with clinical  
403 states and disease stages in cystic fibrosis. *PLoS One*.
- 404 27. Lim YW, Schmieder R, Haynes M, Willner D, Furlan M, Youle M, Abbott K, Edwards R,  
405 Evangelista J, Conrad D, Rohwer F. 2013. Metagenomics and metatranscriptomics: Windows  
406 on CF-associated viral and microbial communities. *J Cyst Fibros* 12:154–164.
- 407 28. Doolittle WF, Booth A. 2016. It’s the song, not the singer: an exploration of holobiosis and  
408 evolutionary theory. *Biol Philos* 32:5–24.
- 409 29. Eng A, Borenstein E. 2018. Taxa-function robustness in microbial communities. *Microbiome*  
410 6:45.
- 411 30. Turnbaugh PJ, Ley RE, Mahowald MA, Magrini V, Mardis ER, Gordon JI. 2006. An obesity-  
412 associated gut microbiome with increased capacity for energy harvest. *Nature* 444:1027–



- 413 1031.
- 414 31. Thaiss CA, Itav S, Rothschild D, Meijer M, Levy M, Moresi C, Dohnalová L, Braverman S,  
415 Rozin S, Malitsky S, Dori-Bachash M, Kuperman Y, Biton I, Gertler A, Harmelin A, Shapiro  
416 H, Halpern Z, Aharoni A, Segal E, Elinav E. 2016. Persistent microbiome alterations  
417 modulate the rate of post-dieting weight regain. *Nature* 540:1–27.
- 418 32. Kerem E, Conway S, Elborn S, Heijerman H, Committee C, others. 2005. Standards of care  
419 for patients with cystic fibrosis: a European consensus. *J Cyst Fibros* 4:7–26.
- 420 33. Smyth AR, Bell SC, Bojcin S, Bryon M, Duff A, Flume P, Kashirskaya N, Munck A, Ratjen  
421 F, Schwarzenberg SJ, Sermet-Gaudelus I, Southern KW, Taccetti G, Ullrich G, Wolfe S.  
422 2014. European cystic fibrosis society standards of care: Best practice guidelines. *J Cyst*  
423 *Fibros* 13:S30–S53.
- 424 34. Taylor-Robinson D, Whitehead M, Diderichsen F, Olesen H V, Pressler T, Smyth RL, Diggle  
425 P. 2012. Understanding the natural progression in %FEV1 decline in patients with cystic  
426 fibrosis: a longitudinal study. *Thorax* 67:860–866.
- 427 35. Bacci G, Bazzicalupo M, Benedetti A, Mengoni A. 2014. StreamingTrim 1.0: A Java  
428 software for dynamic trimming of 16S rRNA sequence data from metagenetic studies. *Mol*  
429 *Ecol Resour* 14:426–434.
- 430 36. Langmead B, Salzberg SL. 2012. Fast gapped-read alignment with Bowtie 2. *Nat Methods*  
431 9:357–9.
- 432 37. Abubucker S, Segata N, Goll J, Schubert AM, Izard J, Cantarel BL, Rodriguez-Mueller B,  
433 Zucker J, Thiagarajan M, Henrissat B, White O, Kelley ST, Methé B, Schloss PD, Gevers D,  
434 Mitreva M, Huttenhower C. 2012. Metabolic reconstruction for metagenomic data and its  
435 application to the human microbiome. *PLoS Comput Biol* 8:e1002358.
- 436 38. Truong DT, Franzosa EA, Tickle TL, Scholz M, Weingart G, Pasolli E, Tett A, Huttenhower  
437 C, Segata N. 2015. MetaPhlan2 for enhanced metagenomic taxonomic profiling. *Nat*  
438 *Methods* 12:902–903.
- 439 39. Nurk S, Meleshko D, Korobeynikov A, Pevzner PA. 2017. MetaSPAdes: A new versatile  
440 metagenomic assembler. *Genome Res* 27:824–834.
- 441 40. Hyatt D, Chen GL, LoCascio PF, Land ML, Larimer FW, Hauser LJ. 2010. Prodigal:  
442 Prokaryotic gene recognition and translation initiation site identification. *BMC*  
443 *Bioinformatics* 11:119.
- 444 41. Huerta-Cepas J, Szklarczyk D, Forslund K, Cook H, Heller D, Walter MC, Rattei T, Mende  
445 DR, Sunagawa S, Kuhn M, Jensen LJ, Von Mering C, Bork P. 2016. EGGNOG 4.5: A  
446 hierarchical orthology framework with improved functional annotations for eukaryotic,  
447 prokaryotic and viral sequences. *Nucleic Acids Res* 44:D286–D293.
- 448 42. Pearson WR. 2013. An introduction to sequence similarity (“homology”) searching., p. 3.1.1-  
449 3.1.8. *In* *Current protocols in bioinformatics*.
- 450 43. Jia B, Raphenya AR, Alcock B, Waglechner N, Guo P, Tsang KK, Lago BA, Dave BM,  
451 Pereira S, Sharma AN, Doshi S, Courtot M, Lo R, Williams LE, Frye JG, Elsayegh T, Sardar  
452 D, Westman EL, Pawlowski AC, Johnson TA, Brinkman FSL, Wright GD, McArthur AG.  
453 2017. CARD 2017: Expansion and model-centric curation of the comprehensive antibiotic  
454 resistance database. *Nucleic Acids Res* 45:D566–D573.

455 44. Bacci G, Paganin P, Lopez L, Vanni C, Dalmastrì C, Cantale C, Daddiego L, Perrotta G,  
456 Dolce D, Morelli P, Tuccio V, De Alessandri A, Fiscarelli EV, Taccetti G, Lucidi V,  
457 Bevivino A, Mengoni A. 2016. Pyrosequencing unveils cystic fibrosis lung microbiome  
458 differences associated with a severe lung function decline. PLoS One 11.

459

460

#### 461 **Availability of data and material**

462 All data generated or analysed during this study are included in this article. Raw sequence data  
463 reported in this study have been deposited in the NCBI “Sequence Read Archive” (SRA) under the  
464 project accession PRJNA516870.

465

#### 466 **Conflict of Interest**

467 We have no conflict of interest to declare.

468

#### 469 **Funding**

470 This study was supported by Italian Grants funded by the Italian Cystic Fibrosis Research  
471 Foundation (FFC) (<http://www.fibrosicisticaricerca.it/>) to Annamaria Bevivino: Project n.  
472 FFC#14/2015 with the contribution of “Delegazione FFC di Latina”, “Latteria Montello Nonno  
473 Nanni”, and “Gruppo di Sostegno FFC Valle Scrivia Alessandria”), and Project n. FFC#19/2017  
474 with the contribution of “Delegazione FFC Lago di Garda con i Gruppi di Sostegno FFC di  
475 Chivasso, dell'Isola Bergamasca, di Arezzo”. Giovanni Bacci was supported by a postdoctoral  
476 fellowship by Italian Cystic Fibrosis Research Foundation. The funders had no role in study design,  
477 data collection and analysis, decision to publish, or preparation of the manuscript.

478

#### 479 **Authors' contributions**

480 Conceived and designed the experiments: AB VL GT EVF AM. Performed the experiments: GB

481 FDC. Analyzed the data: GB AM AB. Contributed reagents/materials/analysis tools: DD FA PM RS

482 AN. Wrote the paper: GB AM AB. Provided comments and recommendations that improved the

483 manuscript: NS GT VL. Supervised research: AB VL GT EVF AM.

484

485 **Tables**

486 **TABLE 1**

487 Characteristics of patients enrolled in the study

| ID                   | Hospital                        | Genotype                                      | Gender      | FEV <sub>1</sub> status | Age         | n  | EX             | %FEV <sub>1</sub> |
|----------------------|---------------------------------|-----------------------------------------------|-------------|-------------------------|-------------|----|----------------|-------------------|
| B01                  | OPBG                            | ΔF508/2183AA->G                               | M           | S                       | 27          | 5  | yes            | 37.0 ± 1.70       |
| B02                  | OPBG                            | ΔF508/N1303K                                  | F           | SD                      | 26          | 3  | no             | 54.7 ± 3.48       |
| B03                  | OPBG                            | ΔF508/4016insT                                | F           | S                       | 30          | 4  | no             | 55.0 ± 1.08       |
| B06                  | OPBG                            | ΔF508/ΔF508                                   | F           | SD                      | 21          | 4  | no             | 60.2 ± 3.42       |
| G10                  | Gaslini                         | ΔF508/ΔF508                                   | M           | S                       | 51          | 4  | no             | 54.0 ± 3.08       |
| G24                  | Gaslini                         | ΔF508/ΔF508                                   | F           | S                       | 49          | 3  | yes            | NA ± NA           |
| G28                  | Gaslini                         | ΔF508/ΔF508                                   | F           | NA                      | 38          | 2  | no             | 42.5 ± 1.50       |
| G30                  | Gaslini                         | ΔF508/ΔF508                                   | F           | S                       | 50          | 1  | no             | 54                |
| G31                  | Gaslini                         | G1244E/G42X                                   | F           | SD                      | 53          | 2  | no             | 41.5 ± 1.50       |
| G34                  | Gaslini                         | ΔF508/ΔF508                                   | F           | S                       | 39          | 1  | no             | 47                |
| M05                  | Meyer                           | ΔF508/ΔF508                                   | M           | SD                      | 32          | 4  | no             | 34.8 ± 0.85       |
| M19                  | Meyer                           | ΔF508/ΔF508                                   | M           | S                       | 24          | 4  | no             | 44.0 ± 2.04       |
| M21                  | Meyer                           | ΔF508/N1303K                                  | M           | SD                      | 27          | 4  | yes            | 51.5 ± 4.35       |
| M22                  | Meyer                           | ΔF508/2789+5G->A                              | F           | S                       | 29          | 5  | yes            | 50.4 ± 1.03       |
| M23                  | Meyer                           | ΔF508/G542X                                   | F           | S                       | 30          | 4  | yes            | 37.0 ± 1.47       |
| M24                  | Meyer                           | ΔF508/ΔF508                                   | M           | S                       | 32          | 4  | no             | 35.2 ± 0.85       |
| M25                  | Meyer                           | ΔF508/296+1G->T                               | F           | SD                      | 41          | 4  | no             | 42.5 ± 2.02       |
| M26                  | Meyer                           | ΔF508/3849+10                                 | F           | SD                      | 49          | 5  | yes            | 39.6 ± 1.94       |
| M28                  | Meyer                           | ΔF508/N1303K                                  | M           | S                       | 23          | 4  | no             | 39.0 ± 1.08       |
| M29                  | Meyer                           | ΔF508/G542X                                   | F           | S                       | 12          | 4  | no             | 43.5 ± 3.75       |
| M31                  | Meyer                           | ΔF508/ΔF508                                   | F           | SD                      | 11          | 3  | yes            | 32.7 ± 4.41       |
| M33                  | Meyer                           | ΔF508/G85E                                    | F           | SD                      | 13          | 5  | yes            | 35.4 ± 5.78       |
| <b>Total:<br/>22</b> | Gaslini:6<br>Meyer:12<br>OPBG:4 | Heterozygote :47<br>Homozygote :29<br>Other:2 | F:15<br>M:7 | S:12<br>SD:9            | 32.1 ± 2.73 | 79 | no:14<br>yes:8 | 43.5 ± 1.09       |

488

489 ID, study id; Hospital, hospital in which patient has been enrolled [OPBG=Children's Hospital and Research  
 490 Institute Bambino Gesù (Rome, Italy); Gaslini=G. Gaslini Institute (University of Genoa, Genoa, Italy);  
 491 Meyer=Cystic Fibrosis Center, Anna Meyer Children's University Hospital (Florence, Italy)]; Genotype,  
 492 CFTR genotype; Gender, gender; Age, enrollment's age; n, number of samples collected; EX, yes if an  
 493 exacerbation event has occurred during the study (no otherwise) (2); FEV<sub>1</sub>, mean value of forced expiratory  
 494 volume in 1 second plus/minus the standard error on the mean; heterozygote and homozygote refers to ΔF508  
 495 genotype; %FEV<sub>1</sub> status: S = with a rate decline lower than 1.5%, SD = with a rate decline higher than 5%  
 496 (44).

497

498 **TABLE 2**

499 Permutational multivariate analysis of variance on both taxonomic distribution and metabolic pathways

|                        | <b>Df</b> | <b>SumOf<br/>Sqs</b> | <b>R<sup>2</sup></b> | <b>F</b>    | <b>Pr(&gt;F)</b> |
|------------------------|-----------|----------------------|----------------------|-------------|------------------|
| <b>TAXONOMY</b>        |           |                      |                      |             |                  |
| <b>Status</b>          | <b>2</b>  | <b>0.68</b>          | <b>0.03</b>          | <b>1.91</b> | <b>0.0300</b>    |
| <b>Genotype</b>        | <b>1</b>  | <b>0.77</b>          | <b>0.03</b>          | <b>4.30</b> | <b>0.0020</b>    |
| <b>Subject</b>         | <b>18</b> | <b>11.97</b>         | <b>0.52</b>          | <b>3.74</b> | <b>0.0010</b>    |
| FEV <sub>1</sub> value | 1         | 0.27                 | 0.01                 | 1.53        | 0.1349           |
| Days                   | 1         | 0.28                 | 0.01                 | 1.58        | 0.1229           |
| Status:Genotype        | 1         | 0.11                 | 0.01                 | 0.64        | 0.7642           |
| Residual               | 49        | 8.72                 | 0.38                 | -           | -                |
| <b>PATHWAY</b>         |           |                      |                      |             |                  |
| <b>Status</b>          | <b>2</b>  | <b>0.20</b>          | <b>0.04</b>          | <b>2.37</b> | <b>0.0220</b>    |
| <b>Genotype</b>        | <b>1</b>  | <b>0.14</b>          | <b>0.03</b>          | <b>3.42</b> | <b>0.0080</b>    |
| <b>Subject</b>         | <b>18</b> | <b>2.43</b>          | <b>0.48</b>          | <b>3.20</b> | <b>0.0010</b>    |
| FEV <sub>1</sub> value | 1         | 0.09                 | 0.02                 | 2.14        | 0.0989           |
| Days                   | 1         | 0.05                 | 0.01                 | 1.26        | 0.2458           |
| Status:Genotype        | 1         | 0.08                 | 0.02                 | 1.96        | 0.1169           |
| Residual               | 49        | 2.07                 | 0.41                 | -           | -                |

500 The permutational multivariate analysis of variance (PERMANOVA) analysis based on taxonomic distribution  
 501 was reported in the upper part of the table whereas the analysis based on metabolic pathways was reported at the  
 502 bottom. Df, degrees of freedom; SumOfSqs, sum of squares; R<sup>2</sup>, r-squared statistic (reported as proportion); F,  
 503 F-statistic; Pr(>F), p-value associated to the F-statistic. Significant effects, namely those reporting a p-value  
 504 lower than 0.05, were reported in bold.

## 505 **Figure legends**

### 506 **FIGURE 1**

507 Taxonomic distribution in patients enrolled in the study. a) The taxonomic distribution of all species  
508 detected using MetaPhlAn2 was reported in each row of the matrix whereas columns represent  
509 samples collected during the study. Colors from dark blue to red were used to report “copies per  
510 million” (CPM) values as obtained from HUMAnN2 with black reporting a CPM value of zero. The  
511 plot was divided according to patient status: BL, baseline; TR, treatment; RC, recovery. Species  
512 were ordered according to their mean abundance and grouped according to their Phylum. b) The  
513 mean abundance value of the top-ten species (if available) detected within each Phylum was  
514 reported together with the standard error. The relative abundance of taxa is reported (Abundance %).

### 515 **FIGURE 2**

516 Ordination analyses based on a) taxonomic assignments and b) pathway distribution detected with  
517 MetaPhlAn2 and HUMAnN2, respectively. Ordination analyses were conducted using the Bray-  
518 Curtis dissimilarity index and ordered following the principle coordinate decomposition method  
519 (PCoA). The percentage of variance explained by each coordinate was reported between round  
520 brackets. Homozygote and heterozygote refer to  $\Delta F508$  mutation of CFTR gene. BL, baseline; TR,  
521 treatment; RC, recovery.

### 522 **FIGURE 3**

523 Strain-level phylogenetic trees of the main CF pathogens detected in the study. Phylogenetic trees  
524 obtained through StrainPhlAn pipeline were reported for the main pathogenic signatures of CF  
525 disease: a) *Pseudomonas aeruginosa*; b) *Staphylococcus aureus*; c) *Rothia mucilaginosa*; d)  
526 *Prevotella melaninogenica*. Points at the end of each clade are colored according to patients so that  
527 two points with the same color, in the same tree, represent the same species in two different time  
528 points, for the same patient.

### 529 **FIGURE 4**

530 Differences across exacerbation events. The effect of an exacerbation event on alpha diversity was  
531 inspected using both the Shannon index and the inverse Simpson index. Diversity indexes were  
532 computed for both a) taxonomic signature and b) metabolic pathways. BL, baseline; TR, treatment;  
533 RC, recovery. Each box shows the “interquartile range” (IQR) that is the differences between the  
534 third and the first quartile of data (the 75<sup>th</sup> and the 25<sup>th</sup> percentile). Horizontal bars are medians  
535 whereas whiskers represent the minimum and maximum values defined as  $Q1 - (1.5 \times IQR)$  and  $Q3$

536 + (1.5 x IQR), respectively. Observations that fell outside minimum and maximum values were  
537 defined as outliers and reported using white points.

538 **FIGURE 5**

539 Pathway distribution according to exacerbation events. The pathway distribution was reported for  
540 each sample (columns) and for each pathway detected (rows). Colors from dark blue to red were  
541 used to report “copies per million” (CPM) values as obtained from HUMAnN2 with black reporting  
542 a CPM value of zero. On the left, the percentage of taxa in which each pathway was detected was  
543 reported using different colors. The main colors correspond to the Phylum whereas the different  
544 shades correspond to the genus detected (if available). BL, baseline; TR, treatment; RC, recovery.

545 **FIGURE 6**

546 Beta diversity analysis on both taxonomic and functional distribution. a) Hierarchical clustering  
547 based on UPGMA method. Clustering was performed on both pathway distribution (the upper  
548 triangle) and taxonomic composition of samples (lower triangle). The Bray-Curtis distance was used  
549 to compute distances between samples, but it was transformed into similarity value by subtracting 1  
550 before plotting. Thus, red colors represent high similarity values whereas blue colors represent low  
551 similarity values. The shape of the points on each tip of trees refers to the hospital whereas the  
552 colors refer to the exacerbation events. b) Results of Tukey’s post hoc test on beta diversity values  
553 across patient genotypes and exacerbation events. Contrasts were computed even to test differences  
554 between taxonomic distribution and pathways with taxa reporting higher level of beta diversity.  
555 Homozygote and heterozygote refer to  $\Delta F508$  mutation of CFTR gene. BL, baseline; TR, treatment;  
556 RC, recovery. Boxplot were computed as described in Figure 4 legend.

557

## 558 **Supplementary materials**

559 Supplementary methods

### 560 **SUPPLEMENTARY TABLES**

561 **TABLE S1** CFTR genotype, sex, age, and antibiotic treatment for each patient

562

563 **TABLE S2** Number of reads for each sample

564

565 **TABLE S3** Summary of all species detected with a mean abundance higher than 0.2%

566

567 **TABLE S4** Analysis of variance on alpha diversity indices

568

569 **TABLE S5** Tukey post hoc test on alpha diversity indices

570

571 **TABLE S6** Tukey post hoc test on Sorensen similarity index

572

573 **TABLE S7** Metabolic pathways differentially distributed across clinical statuses

574

575 **TABLE S8** Antibiotic resistance genes differentially distributed across clinical statuses

576

577 **TABLE S9** Antibiotic resistance genes differentially distributed depending on drug intake

578

### 579 **SUPPLEMENTARY FIGURES**

580 **FIGURE S1** Strain-level phylogenetic trees of all detected microbes in the study

581

582 **FIGURE S2** Effect of genotypes and samples on the bacterial diversity of lung microbiome

583

584 **FIGURE S3** Differential abundant pathways

585

586 **FIGURE S4** Differential abundant antibiotic resistance genes

587

588 **FIGURE S5** Effect of the antibiotic intake on the distribution of antibiotic resistance genes

589

590 **FIGURE S6** Antibiotic resistance genes map

591

592 **FIGURE S7** Antibiotic resistance map of each sample included in the study



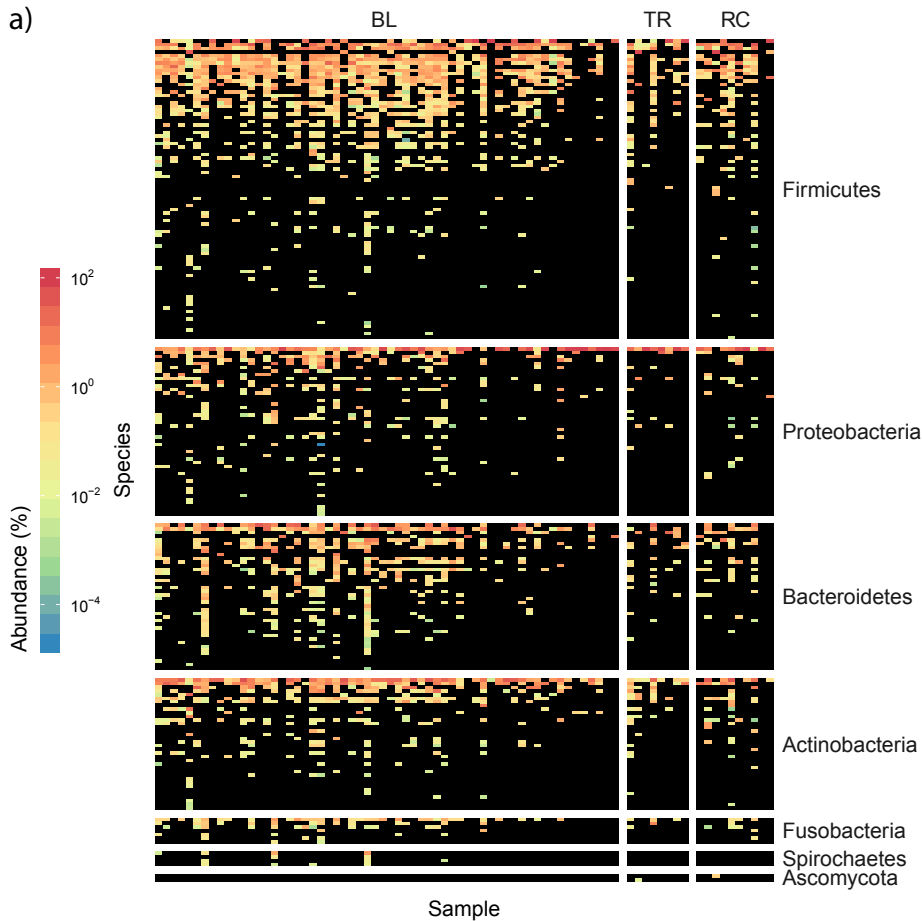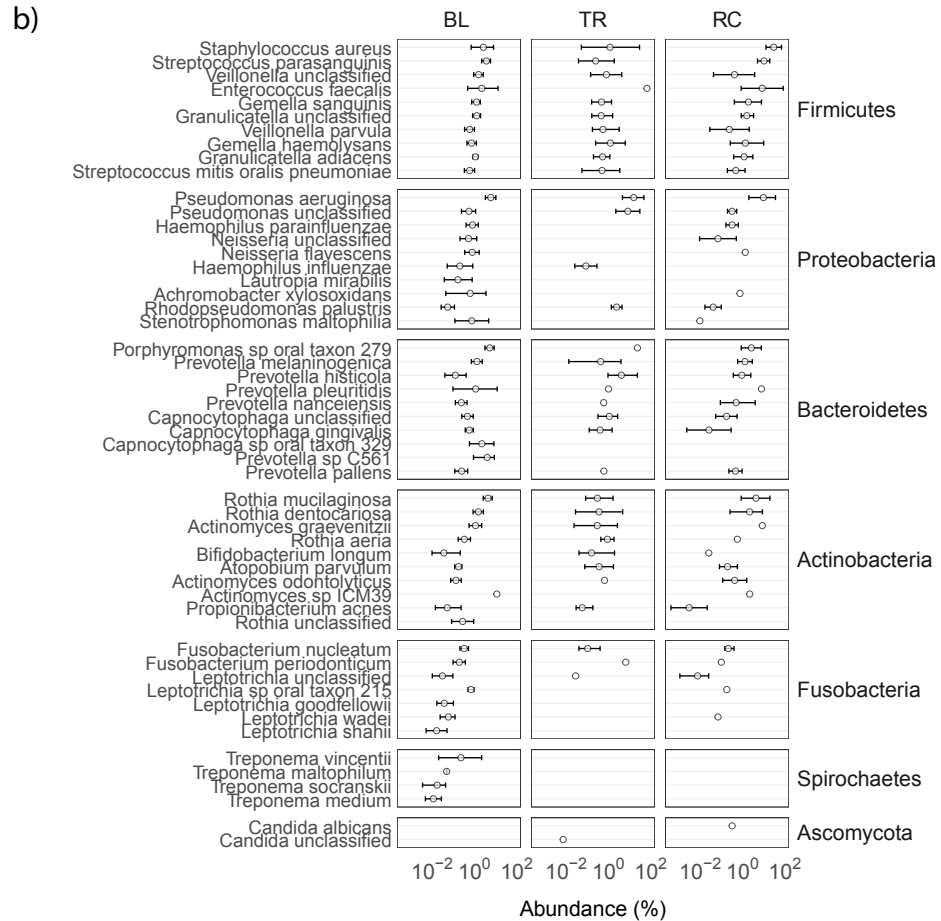

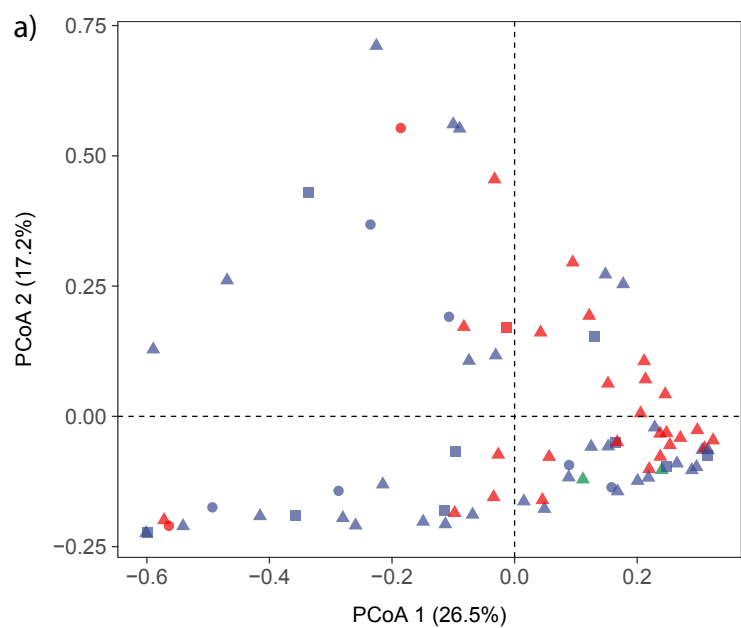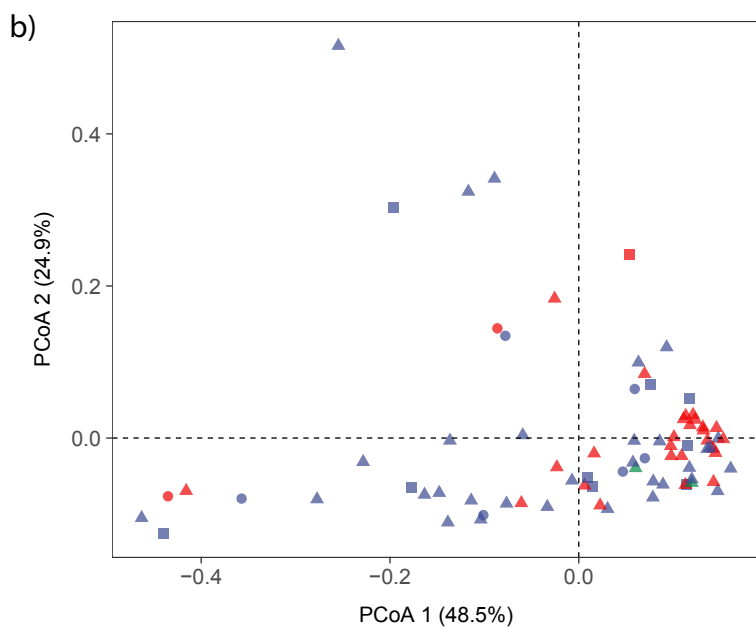

**Genotype** ● heterozygote ● homozygote ● other  
**Status** ● TR ▲ BL ■ RC

**a**

0.001

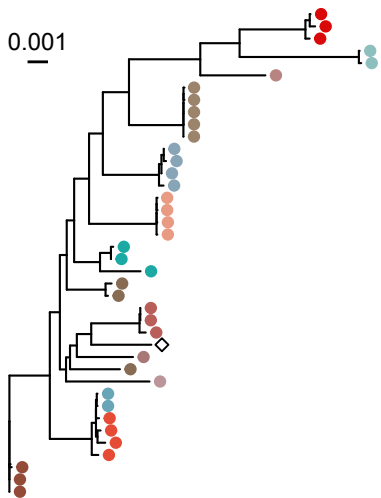**b**

0.002

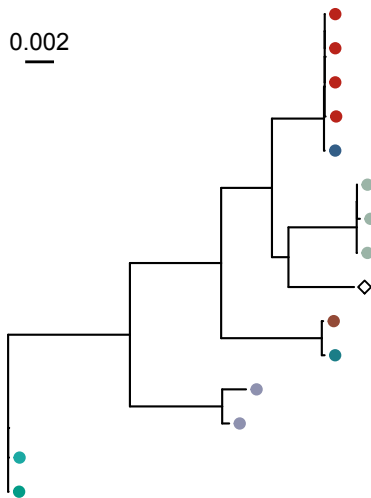**c**

0.01

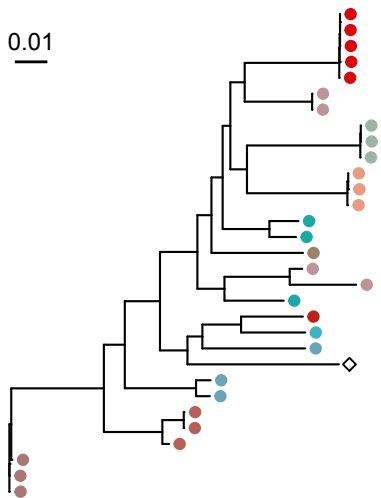**d**

0.002

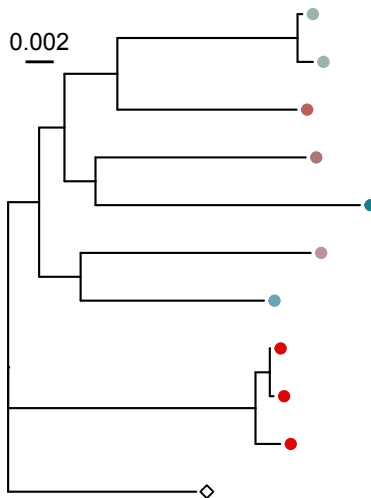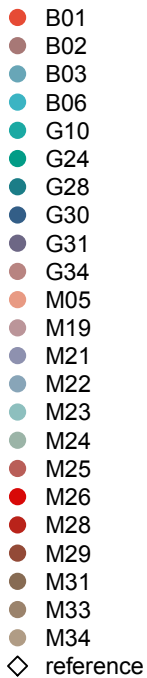

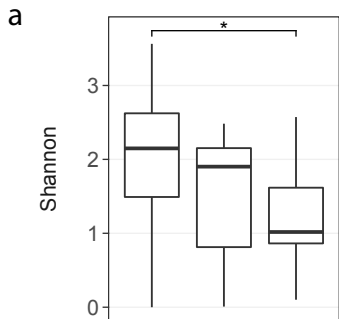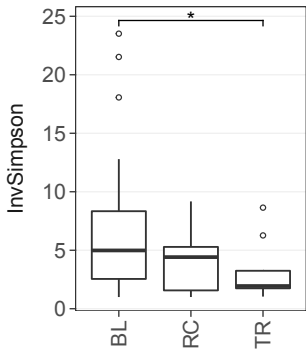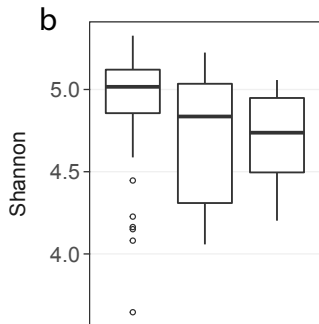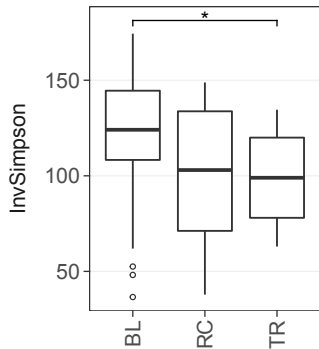

Pathways

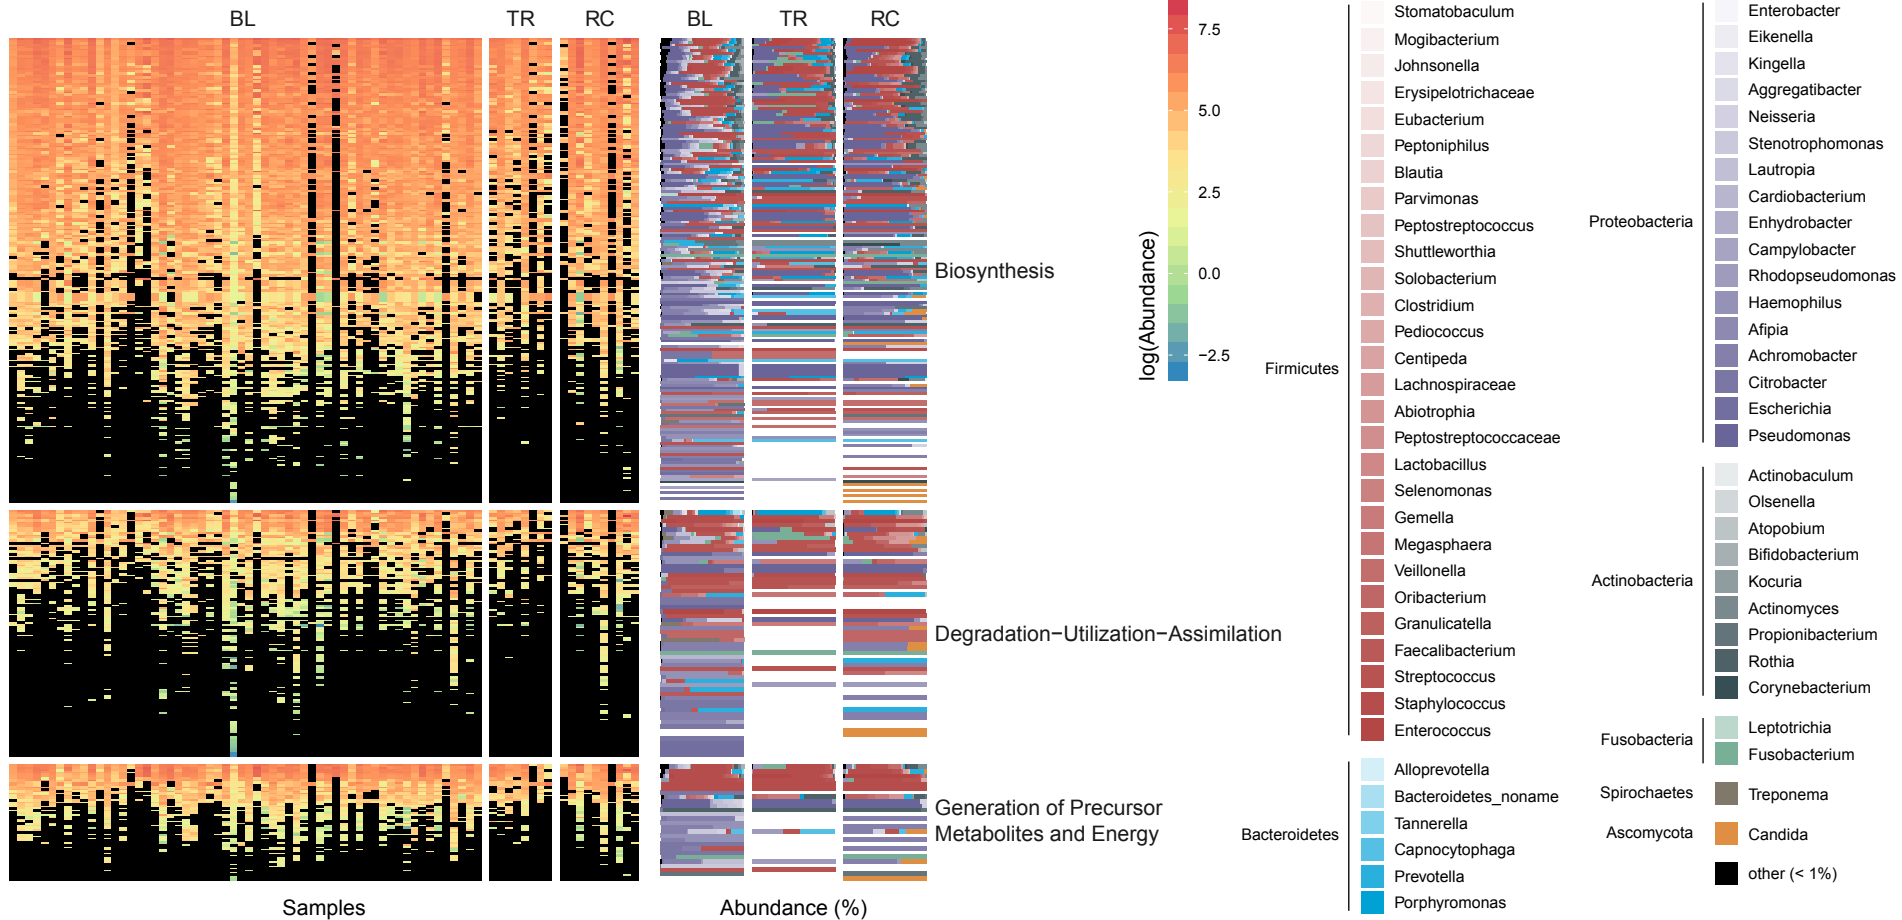

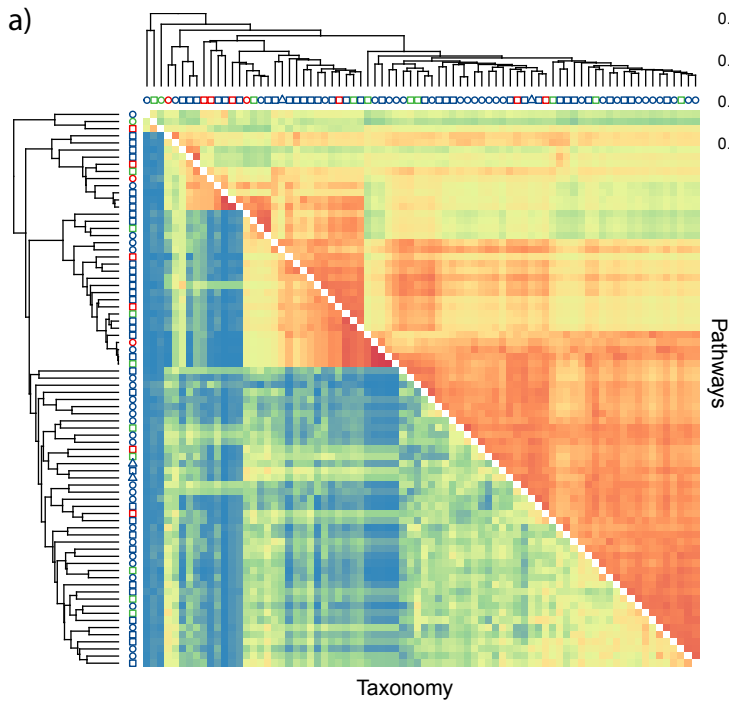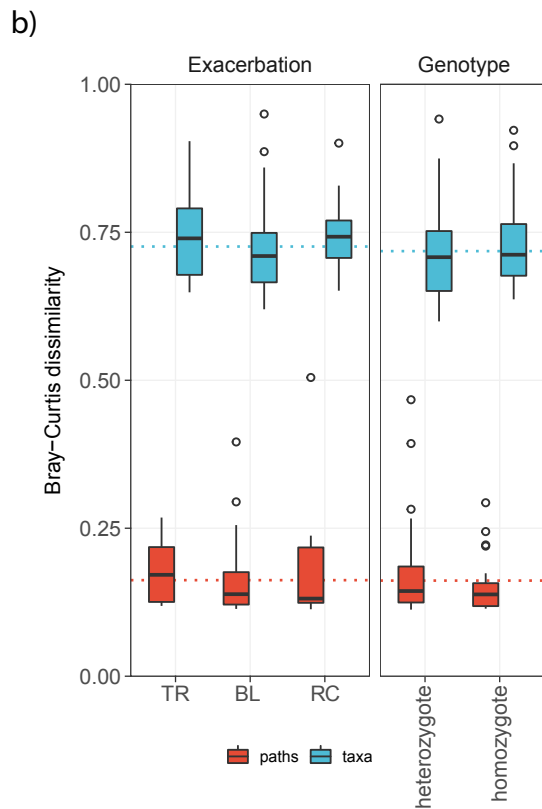

Source: https://www.biorxiv.org/content/10.1101/609057v3.full.pdf
